# Supplementary material for: Highly diastereoselective synthesis of 3-methylenetetrahydropyrans by palladium-catalyzed oxa-[4 + 2] cycloaddition of 2-alkenylbenzothiazoles
Source: Royal Society of Chemistry journal article supplement (doi:10.1039/d0ob01434f), 2020-01-01
Supplement: d0ob01434f1.pdf [file d0ob01434f1.pdf]

## Content

|                                                                          |    |
|--------------------------------------------------------------------------|----|
| 1. General information .....                                             | 2  |
| 2. General procedure for the preparation of substrates <b>1</b> . ....   | 2  |
| 3. General procedure for the preparation of substrates <b>2</b> . ....   | 3  |
| 4. General procedure for the synthetic transformation of <b>3a</b> ..... | 3  |
| 5. Screening of asymmetric reaction Conditions. ....                     | 4  |
| 6. Analytical data.....                                                  | 6  |
| 7. X-ray crystallographic analysis.....                                  | 13 |
| 8. NMR spectra .....                                                     | 14 |
| 9. Reference.....                                                        | 39 |

## 1. General information

The products were purified by column chromatography on silica gel (200-300 mesh). For thin-layer chromatography (TLC) analysis, silica gel plates (HSGF254) were used. Visualization of the developed TLC plates was performed with ultraviolet irradiation (254 nm) or staining potassium permanganate solution followed by heating using a heat gun. High resolution mass spectra on a Bruker Apex IV RTMS spectrometer.  $^1\text{H}$  and  $^{13}\text{C}$  NMR spectra were recorded on Bruker AVANCE-400 (400 MHz) spectrometer. Chemical shifts were reported in parts per million (ppm,  $\delta$ ), and the residual solvent peak was used as an internal reference: proton (chloroform  $\delta$  7.26 ppm), carbon (chloroform  $\delta$  77.0 ppm) or tetramethylsilane (TMS  $\delta$  0.00 ppm) was used as a reference. Multiplicity was indicated as follows: s (singlet), d (doublet), t (triplet), q (quartet), m (multiplet), dd (doublet of doublet), bs (broad singlet). Coupling constants were reported in Hertz (Hz). Melting points were determined on a SGW X-4 melting apparatus. Analytical HPLC was performed on a Thermo 3000 Series instrument using Daicel Chiralcel® columns as noted. All reactions were carried out under argon atmosphere. All solvents were purified and dried according to standard methods prior to use. Racemic samples were prepared by using racemic BINAP as ligand.

## 2. General procedure for the preparation of substrates 1.

Preparation of **1a-1s**, **1u** and **1v**.<sup>[1]</sup>

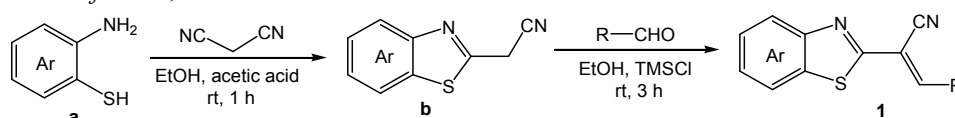

**Scheme S1.** Preparation of substrates **1**

A solution of 2-aminothiophenol **a** (30 mmol), malononitrile (30 mmol) and acetic acid (30 mmol) in ethanol (50 mL) was stirred at room temperature for 1 h. The precipitate was filtered off and recrystallized from ethanol to afford benzothiazol-2-yl acetonitrile **b**. A solution of the corresponding aldehyde (5 mmol), benzothiazol-2-yl acetonitrile (5 mmol) and TMSCl (1.3 mL) in EtOH (10 mL) was stirred at room temperature for 3 h. Then, the mixture was poured into H<sub>2</sub>O (20 mL), the precipitated solid was filtered and washed by *i*-PrOH to afford the product **1a-1s**, **1u** and **1v**. All the substrates **1** were listed in **Figure S1**.

Preparation of **1t**.

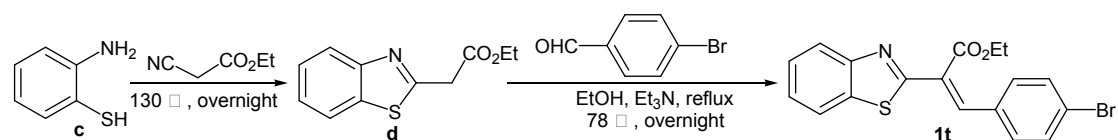

**Scheme S2.** Preparation of substrates **1t**.

A mixture of 2-aminothiophenol **c** (20 mmol), ethyl cyanoacetate (20 mmol) was stirred at 130 °C for overnight. The residue was purified by flash column chromatography (5% EtOAc in petroleum ether, silica gel) to afford benzothiazol-2-yl acetic acid ethyl ester **d**. A solution of the corresponding aldehyde (5 mmol), benzothiazol-2-yl acetic acid ethyl ester **d** (5 mmol) and Et<sub>3</sub>N (2.0 equiv) in EtOH (10 mL) was stirred at 78 °C for overnight and then concentrated in *vacuo*. The crude reaction mixture was purified by flash column chromatography (1.5% EtOAc in petroleum ether, silica gel) to afford the product **1t**.

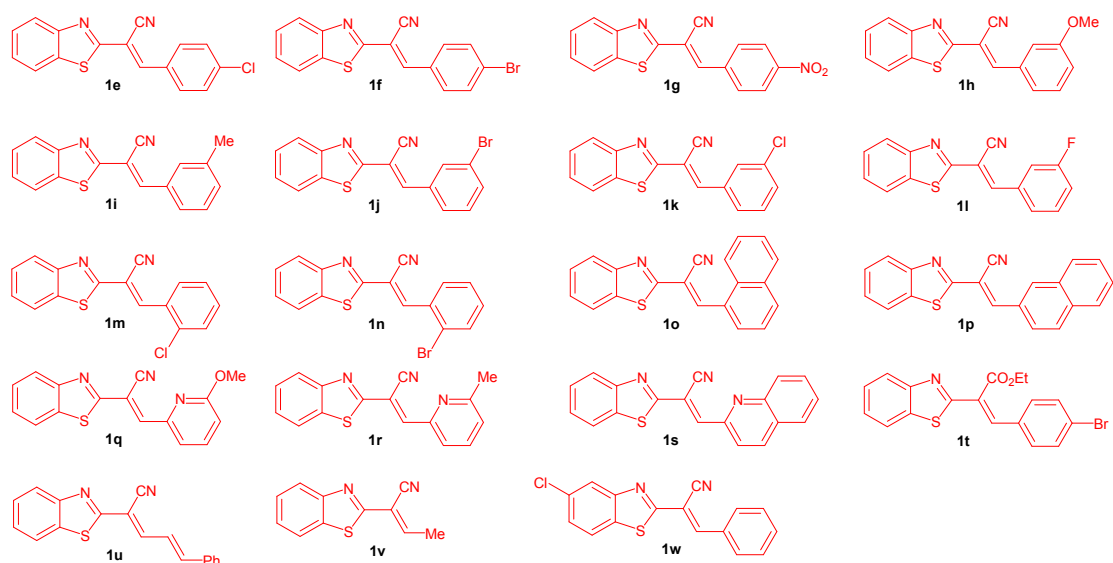

Figure S1. Structures of substrates 1.

### 3. General procedure for the preparation of substrates 2.

Substrates 2 were synthesized from the 2-methylene-1,3-propanediol.<sup>[2]</sup>

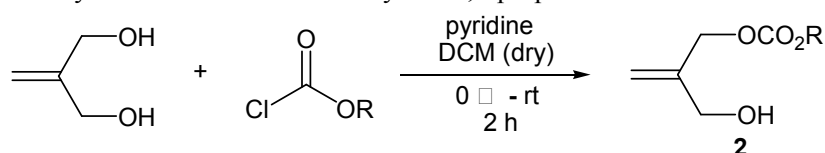

Scheme S3. Preparation of substrates 2.

To a solution of 2-methylene-1,3-propanediol (25 mmol) in anhydrous  $\text{CH}_2\text{Cl}_2$  (25 mL) was added pyridine (50 mmol) at 0 °C and stirred for 10 minutes. To the mixture was added a solution of chloroformate (26 mmol) in anhydrous  $\text{CH}_2\text{Cl}_2$  (25 mL) dropwise for 40 minutes. After stirring for 2 h, the reaction mixture was quenched with  $\text{H}_2\text{O}$ , extracted with  $\text{CH}_2\text{Cl}_2$  and then concentrated in *vacuo*. The residue was purified by flash chromatography by silica gel (PE/EA = 5/1) to afford allyl carbonate 2 as a colorless oil. All the substrates 2 were listed in Figure S2.

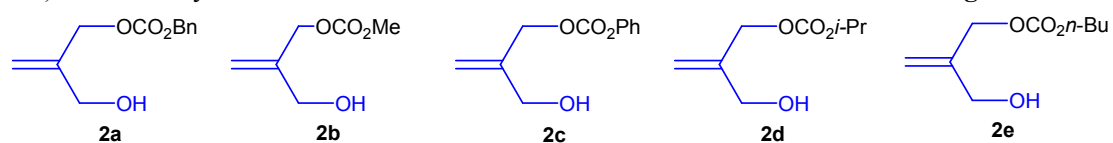

Figure S2. Structures of substrates 2.

### 4. General procedure for the synthetic transformation of 3a

*Preparation of 4.*

To a solution of 3a (33 mg, 0.1 mmol) in EtOH (1 mL) was added Pd/C (23 mg) and the mixture was stirred at 50 °C under  $\text{H}_2$  atmosphere (ballon) for 12 h. The conversion was monitored by TLC. The mixture was filtrated through a pad of Celite and the filtration was concentrated in *vacuo*, the residue was purified by column chromatography on silica gel to afford the product 4 in 90% yield (30.1 mg).

*Preparation of 5.*

To a solution of **3a** (33 mg, 0.1 mmol) in DCE (1 mL) was added *m*-CPBA (0.18 mmol, 31 mg) in three pots and the mixture was stirred at 84 °C for 24 h. After the reaction was completed, the solid was filtrated through a pad of Celite and the filtration was concentrated in *vacuo*, the residue was purified by column chromatography on silica gel to afford the product **5** in 61% yield (21.3 mg).

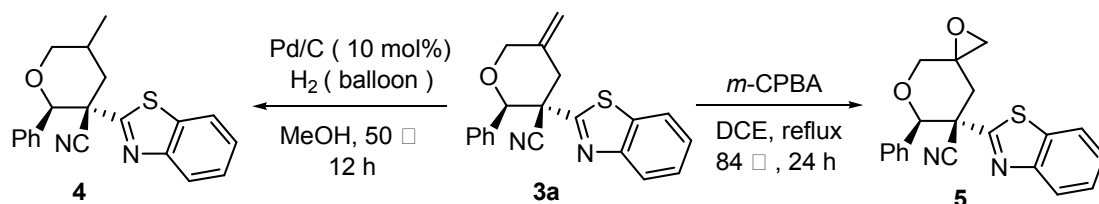

Scheme S4. Synthetic transformation of **3a**

## 5. Screening of asymmetric reaction Conditions.

Table S1. Optimization of the reaction conditions.<sup>a</sup>

**L1**: 
**L2**: 
**L3**: 
**L4**: 
**L5**: 
**L6**: 
**L7**:

| Entry | LG                  | [M]<br>(mol %)                                        | L         | Solvent | t<br>(h) | dr<br>(%) <sup>c</sup> | Yield<br>(%) <sup>b</sup> | ee<br>(%) <sup>d</sup> |
|-------|---------------------|-------------------------------------------------------|-----------|---------|----------|------------------------|---------------------------|------------------------|
| 1     | OCO <sub>2</sub> Bn | Pd(OAc) <sub>2</sub>                                  | <b>L1</b> | THF     | 15       | >20:1                  | 95                        | 5                      |
| 2     | OCO <sub>2</sub> Bn | Pd <sub>2</sub> (dba) <sub>3</sub>                    | <b>L1</b> | THF     | 24       | -                      | NR                        | -                      |
| 3     | OCO <sub>2</sub> Bn | Pd(dba) <sub>2</sub>                                  | <b>L1</b> | THF     | 24       | -                      | NR                        | -                      |
| 4     | OCO <sub>2</sub> Bn | Pd <sub>2</sub> (dba) <sub>3</sub> ·CHCl <sub>3</sub> | <b>L1</b> | THF     | 24       | -                      | NR                        | -                      |
| 5     | OCO <sub>2</sub> Bn | Pd(MeCN) <sub>2</sub> Cl <sub>2</sub>                 | <b>L1</b> | THF     | 24       | -                      | NR                        | -                      |
| 6     | OCO <sub>2</sub> Bn | [IrCl(cod) <sub>2</sub> ] <sub>2</sub>                | <b>L1</b> | THF     | 24       | -                      | NR                        | -                      |

|                 |                               |                            |           |                   |           |                 |           |           |
|-----------------|-------------------------------|----------------------------|-----------|-------------------|-----------|-----------------|-----------|-----------|
| 7               | OCO <sub>2</sub> Bn           | Pd(OAc) <sub>2</sub>       | <b>L1</b> | Et <sub>2</sub> O | 12        | >20:1           | 85        | 6         |
| 8               | OCO <sub>2</sub> Bn           | Pd(OAc) <sub>2</sub>       | <b>L1</b> | 1,4-Dioxane       | 24        | -               | NR        | -         |
| 9               | OCO <sub>2</sub> Bn           | Pd(OAc) <sub>2</sub>       | <b>L1</b> | Toluene           | 24        | -               | NR        | -         |
| 10              | OCO <sub>2</sub> Bn           | Pd(OAc) <sub>2</sub>       | <b>L1</b> | DCM               | 24        | -               | NR        | -         |
| 11              | OCO <sub>2</sub> Bn           | Pd(OAc) <sub>2</sub>       | <b>L1</b> | MeCN              | 24        | -               | NR        | -         |
| 12              | OCO <sub>2</sub> Bn           | Pd(OAc) <sub>2</sub>       | <b>L1</b> | TBME              | 12        | >20:1           | 95        | 12        |
| 13              | OCO <sub>2</sub> Bn           | Pd(OAc) <sub>2</sub>       | <b>L2</b> | TBME              | 20        | >20:1           | 92        | 3         |
| 14              | OCO <sub>2</sub> Bn           | Pd(OAc) <sub>2</sub>       | <b>L3</b> | TBME              | 20        | -               | NR        | -         |
| <b>15</b>       | <b>OCO<sub>2</sub>Bn</b>      | <b>Pd(OAc)<sub>2</sub></b> | <b>L4</b> | <b>TBME</b>       | <b>24</b> | <b>&gt;20:1</b> | <b>95</b> | <b>37</b> |
| 16              | OCO <sub>2</sub> Bn           | Pd(OAc) <sub>2</sub>       | <b>L5</b> | TBME              | 24        | -               | NR        | -         |
| 17              | OCO <sub>2</sub> Bn           | Pd(OAc) <sub>2</sub>       | <b>L6</b> | TBME              | 24        | -               | NR        | -         |
| 18              | OCO <sub>2</sub> Bn           | Pd(OAc) <sub>2</sub>       | <b>L7</b> | TBME              | 24        | -               | NR        | -         |
| 19              | OCO <sub>2</sub> Me           | Pd(OAc) <sub>2</sub>       | <b>L4</b> | TBME              | 48        | >20:1           | 96        | 34        |
| 20              | OCO <sub>2</sub> Ph           | Pd(OAc) <sub>2</sub>       | <b>L4</b> | TBME              | 70        | >20:1           | 98        | 33        |
| 21              | OCO <sub>2</sub> <i>i</i> -Pr | Pd(OAc) <sub>2</sub>       | <b>L4</b> | TBME              | 48        | >20:1           | 99        | 34        |
| 22              | OCO <sub>2</sub> <i>n</i> -Bu | Pd(OAc) <sub>2</sub>       | <b>L4</b> | TBME              | 70        | >20:1           | 95        | 33        |
| 23 <sup>e</sup> | OCO <sub>2</sub> Bn           | Pd(OAc) <sub>2</sub>       | <b>L3</b> | TBME              | 24        | -               | NR        | -         |
| 24 <sup>e</sup> | OCO <sub>2</sub> Bn           | Pd(OAc) <sub>2</sub>       | <b>L5</b> | TBME              | 24        | -               | NR        | -         |
| 25 <sup>e</sup> | OCO <sub>2</sub> Bn           | Pd(OAc) <sub>2</sub>       | <b>L6</b> | TBME              | 24        | -               | NR        | -         |
| 26 <sup>e</sup> | OCO <sub>2</sub> Bn           | Pd(OAc) <sub>2</sub>       | <b>L7</b> | TBME              | 24        | -               | NR        | -         |

<sup>a</sup> General conditions: **1a** (0.1 mmol), **2a** (0.15 mmol), [Pd] (5 mol %), and **L** (5 mol %) in solvent (1.0 mL) at room temperature. <sup>b</sup> All yields refer to the isolated yields. <sup>c</sup> The dr values were determined by <sup>1</sup>H NMR spectroscopy. <sup>d</sup> Enantiomeric excess was determined by chiral HPLC. NR = No reaction. <sup>e</sup> 50 °C.

#### HPLC acquisition parameters:

Chiral column: CHIRALCEL ® OD-H, Wave length: 254 nm,

Mobile phase: *n*-hexane:*i*-PrOH =5:95, Flow rate: 1.0 mL/min, Temperature: 30 °C.

#### HPLC Spectra of racemic **3a**

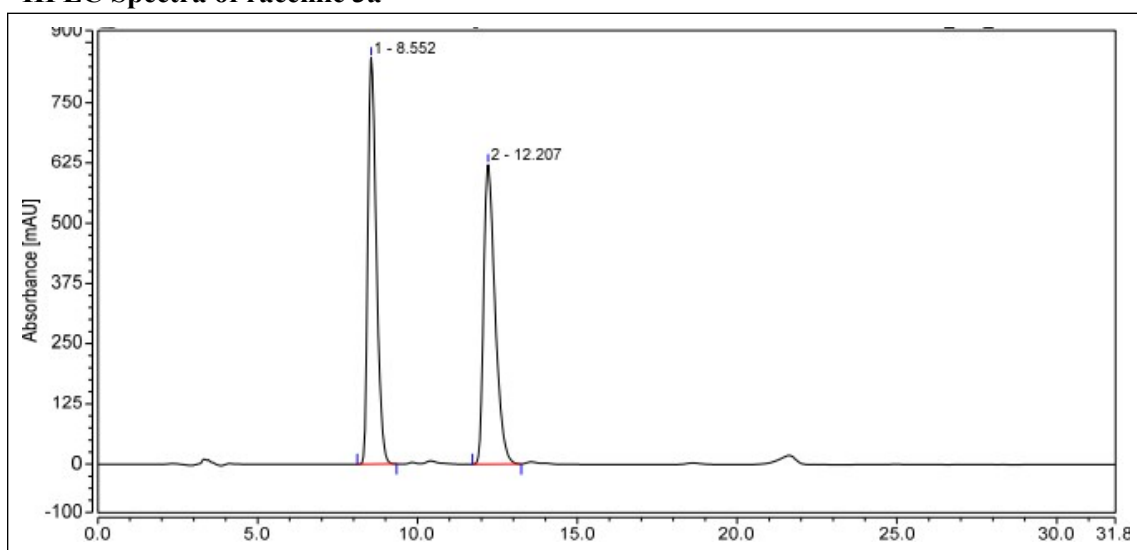

| Peak | RetTime | Area | Height | Area | Height |
|------|---------|------|--------|------|--------|
|------|---------|------|--------|------|--------|

|   | (min)  | (mAu*min) | (mAu)   | (%)   | (%)   |
|---|--------|-----------|---------|-------|-------|
| 1 | 8.552  | 258.716   | 842.896 | 50.13 | 57.55 |
| 2 | 12.207 | 257.398   | 621.718 | 49.87 | 42.45 |

### HPLC Spectra of enantiomeric 3a

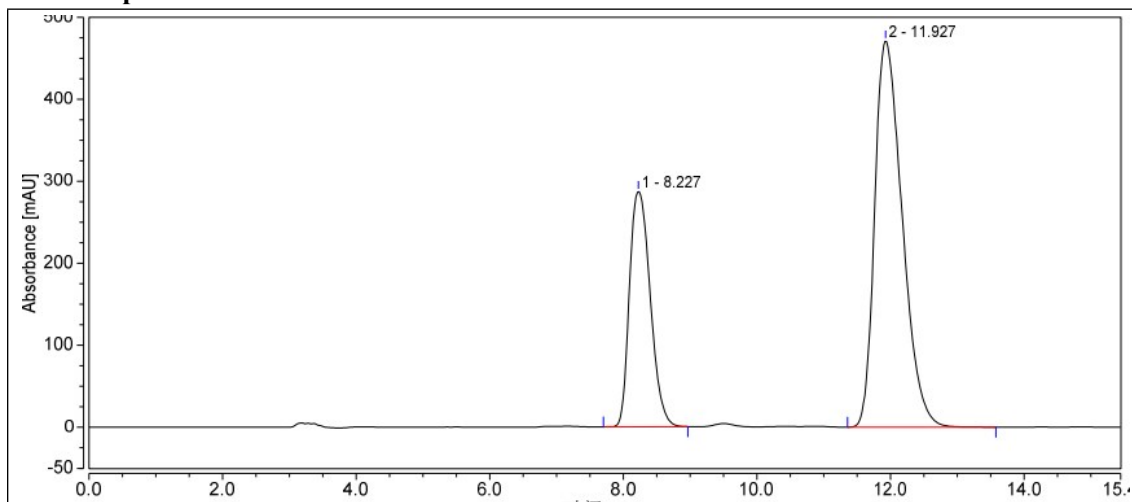

| Peak | RetTime (min) | Area (mAu*min) | Height (mAu) | Area (%) | Height (%) |
|------|---------------|----------------|--------------|----------|------------|
| 1    | 8.227         | 103.068        | 287.026      | 31.42    | 37.86      |
| 2    | 11.927        | 224.932        | 471.163      | 68.58    | 62.14      |

## 6. Analytical data

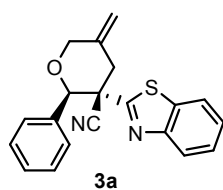

The compound **3a** was prepared according to the general procedure. The product was obtained as a white solid (31.6 mg, 95% yield). Melting point 130-132 °C.

**<sup>1</sup>H NMR (400 MHz, CDCl<sub>3</sub>)**  $\delta$  8.07 (dt,  $J$  = 8.3, 0.9 Hz, 1H), 7.78 (dt,  $J$  = 8.0, 0.9 Hz, 1H), 7.70 – 7.44 (m, 1H), 7.48 – 7.30 (m, 1H), 7.25 – 7.17 (m, 1H), 7.15 (d,  $J$  = 4.3 Hz, 4H), 5.34 – 5.26 (m, 1H), 5.24 – 5.17 (m, 1H), 5.09 (s, 1H), 4.62 (dd,  $J$  = 12.6, 1.9 Hz, 1H), 4.41 (d,  $J$  = 12.5 Hz, 1H), 3.68 (dd,  $J$  = 14.0, 1.6 Hz, 1H), 3.10 (dd,  $J$  = 14.0, 1.8 Hz, 1H).

**<sup>13</sup>C NMR (100 MHz, CDCl<sub>3</sub>)**  $\delta$  165.94, 153.08, 137.00, 135.96, 134.56, 128.87, 128.12, 127.03, 126.62, 125.75, 123.26, 121.80, 118.34, 115.20, 84.76, 73.03, 53.25, 43.58.

**HRMS (ESI)**  $m/z$  Calcd for C<sub>20</sub>H<sub>16</sub>N<sub>2</sub>OS, [M+H]<sup>+</sup>: 333.1056; Found: 333.1051.

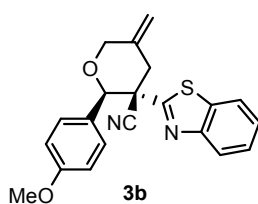

The compound **3b** was prepared according to the general procedure. The product was obtained as a white solid (28.3 mg, 78% yield). Melting point 65-67 °C.

**<sup>1</sup>H NMR (400 MHz, CDCl<sub>3</sub>)**  $\delta$  8.06 (dt,  $J$  = 8.2, 0.9 Hz, 1H), 7.79 (dt,  $J$  = 8.0, 0.9 Hz, 1H), 7.53 (ddd,  $J$  = 8.3, 7.2, 1.2 Hz, 1H), 7.41 (ddd,  $J$  = 8.2, 7.2, 1.2 Hz, 1H), 7.15 – 6.92 (m, 2H), 6.82 – 6.55 (m, 2H), 5.27 (q,  $J$  = 1.4 Hz, 1H), 5.22 – 5.15 (m, 1H), 5.04 (s, 1H), 4.60 (dd,  $J$  = 12.6, 1.9 Hz, 1H), 4.39 (d,  $J$  = 12.5 Hz, 1H), 3.71 (s, 3H), 3.69 – 3.60 (m, 1H), 3.08 (dd,  $J$  = 14.0, 1.9 Hz, 1H).

**<sup>13</sup>C NMR (100 MHz, CDCl<sub>3</sub>)**  $\delta$  166.12, 159.84, 153.07, 137.11, 134.58, 128.27, 128.22, 126.58,

125.71, 123.24, 121.82, 118.52, 115.11, 113.49, 84.42, 73.09, 55.14, 53.42, 43.50.

**HRMS (ESI)**  $m/z$  Calcd for  $C_{21}H_{18}N_2O_2S$ ,  $[M+H]^+$  : 363.1162; Found: 363.1160.

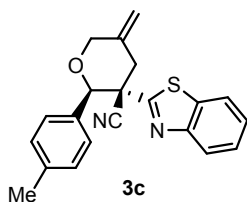

The compound **3c** was prepared according to the general procedure. The product was obtained as a white solid (33.3 mg, 96% yield). Melting point 128-130 °C.

**$^1H$  NMR (400 MHz,  $CDCl_3$ )**  $\delta$  8.07 (dt,  $J = 8.2, 0.9$  Hz, 1H), 7.79 (dt,  $J = 8.0, 0.9$  Hz, 1H), 7.53 (ddd,  $J = 8.3, 7.2, 1.3$  Hz, 1H), 7.41 (ddd,  $J = 8.2, 7.2, 1.2$  Hz, 1H), 7.04 (d,  $J = 8.2$  Hz, 2H), 6.95 (d,  $J = 8.0$  Hz, 2H), 5.27 (t,  $J = 1.5$  Hz, 1H), 5.23 – 5.14 (m, 1H), 5.06 (s, 1H), 4.60 (dd,  $J = 12.5, 1.8$  Hz, 1H), 4.40 (d,  $J = 12.5$  Hz, 1H), 3.66 (dd,  $J = 14.0, 1.6$  Hz, 1H), 3.09 (dd,  $J = 13.9, 1.8$  Hz, 1H), 2.23 (s, 3H).

**$^{13}C$  NMR (100 MHz,  $CDCl_3$ )**  $\delta$  166.08, 153.08, 138.61, 137.10, 134.57, 133.01, 128.80, 126.89, 126.58, 125.70, 123.25, 121.80, 118.47, 115.08, 84.63, 73.03, 53.32, 43.62, 21.18.

**HRMS (ESI)**  $m/z$  Calcd for  $C_{21}H_{18}N_2OS$ ,  $[M+H]^+$  : 347.1213 ; Found: 347.1218.

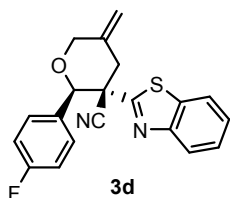

The compound **3d** was prepared according to the general procedure. The product was obtained as a white solid (30.8 mg, 88% yield). Melting point 113-115 °C.

**$^1H$  NMR (400 MHz,  $CDCl_3$ )**  $\delta$  8.07 (d,  $J = 8.2$  Hz, 1H), 7.89 – 7.70 (m, 1H), 7.54 (ddd,  $J = 8.4, 7.2, 1.2$  Hz, 1H), 7.43 (ddd,  $J = 8.2, 7.2, 1.2$  Hz, 1H), 7.19 – 7.04 (m, 2H), 6.93 – 6.65 (m, 2H), 5.28 (q,  $J = 1.4$  Hz, 1H), 5.21 – 5.15 (m, 1H), 5.09 (s, 1H), 4.60 (dd,  $J = 12.6, 1.9$  Hz, 1H), 4.40 (d,  $J = 12.6$  Hz, 1H), 3.65 (dd,  $J = 14.0, 1.6$  Hz, 1H), 3.09 (dd,  $J = 14.0, 1.9$  Hz, 1H).

**$^{13}C$  NMR (100 MHz,  $CDCl_3$ )**  $\delta$  165.74, 164.12, 161.66, 153.07, 136.79, 134.47, 131.92, 131.89, 128.89, 128.80, 126.72, 125.88, 123.28, 121.85, 118.20, 115.35, 115.21, 114.99, 84.00, 73.06, 53.29 , 43.51.

**HRMS (ESI)**  $m/z$  Calcd for  $C_{20}H_{15}FN_2OS$ ,  $[M+H]^+$  : 351.0962; Found: 351.0960.

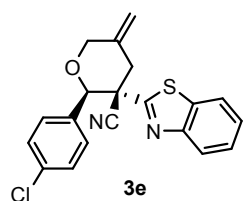

The compound **3e** was prepared according to the general procedure. The product was obtained as a white solid (30.4 mg, 83% yield). Melting point 161-163 °C.

**$^1H$  NMR (400 MHz,  $CDCl_3$ )**  $\delta$  8.07 (dt,  $J = 8.3, 0.9$  Hz, 1H), 7.81 (dt,  $J = 8.1, 0.9$  Hz, 1H), 7.55 (ddd,  $J = 8.3, 7.2, 1.2$  Hz, 1H), 7.43 (ddd,  $J = 8.3, 7.2, 1.2$  Hz, 1H), 7.18 – 6.97 (m, 4H), 5.28 (p,  $J = 1.2$  Hz, 1H), 5.23 – 5.16 (m, 1H), 5.10 (s, 1H), 4.60 (dd,  $J = 12.5, 1.8$  Hz, 1H), 4.40 (d,  $J = 12.6$  Hz, 1H), 3.79 – 3.59 (m, 1H), 3.09 (dd,  $J = 13.9, 1.8$  Hz, 1H).

**$^{13}C$  NMR (100 MHz,  $CDCl_3$ )**  $\delta$  165.60, 153.07, 136.69, 134.77, 134.53, 134.45, 128.41, 128.32, 126.76, 125.92, 123.29, 121.90, 118.11, 115.40, 83.91, 73.00, 53.17, 43.57.

**HRMS (ESI)**  $m/z$  Calcd for  $C_{20}H_{15}ClN_2OS$ ,  $[M+H]^+$  : 367.0666; Found: 367.0662.

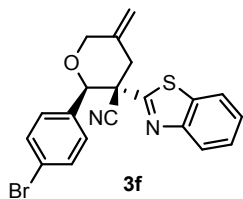

The compound **3f** was prepared according to the general procedure. The product was obtained as a white solid (39.1 mg, 95% yield). Melting point 182-184°C.

**$^1H$  NMR (400 MHz,  $CDCl_3$ )**  $\delta$  8.06 (dt,  $J = 8.3, 0.9$  Hz, 1H), 7.94 – 7.72 (m, 1H), 7.55 (ddd,  $J = 8.3, 7.2, 1.3$  Hz, 1H), 7.43 (ddd,  $J = 8.3, 7.2, 1.2$  Hz, 1H), 7.30 – 7.26 (m, 2H), 7.09 – 6.86 (m, 2H), 5.28 (d,  $J = 1.7$  Hz, 1H), 5.24 – 5.13 (m, 1H), 5.09 (s, 1H),

4.60 (dd,  $J = 12.6, 1.9$  Hz, 1H), 4.39 (d,  $J = 12.5$  Hz, 1H), 3.64 (dq,  $J = 14.0, 1.8$  Hz, 1H), 3.09 (dd,  $J = 14.0, 1.9$  Hz, 1H).

$^{13}\text{C}$  NMR (100 MHz,  $\text{CDCl}_3$ )  $\delta$  165.57, 153.07, 136.68, 135.04, 134.45, 131.26, 128.71, 126.76, 125.93, 123.29, 123.07, 121.92, 118.08, 115.40, 83.93, 72.99, 53.11, 43.60.

HRMS (ESI)  $m/z$  Calcd for  $\text{C}_{20}\text{H}_{15}\text{BrN}_2\text{OS}$ ,  $[\text{M}+\text{H}]^+$  : 411.0161; Found: 411.0165.

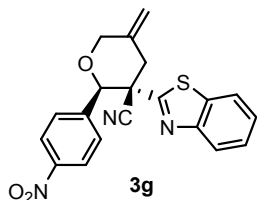

The compound **3g** was prepared according to the general procedure. The product was obtained as a white solid (30.6 mg, 81% yield). Melting point 148-150 °C.

$^1\text{H}$  NMR (400 MHz,  $\text{CDCl}_3$ )  $\delta$  8.08 (dt,  $J = 8.2, 0.9$  Hz, 1H), 8.04 – 7.89 (m, 2H), 7.82 (dt,  $J = 8.0, 0.9$  Hz, 1H), 7.57 (ddd,  $J = 8.3, 7.2, 1.2$  Hz, 1H), 7.46 (ddd,  $J = 8.3, 7.2, 1.2$  Hz, 1H), 7.35 – 7.28 (m, 2H), 5.34 – 5.29 (m, 1H), 5.27 (s, 1H), 5.24 – 5.19 (m, 1H), 4.63 (dd,  $J = 12.6, 1.8$  Hz, 1H), 4.43 (d,  $J = 12.6$  Hz, 1H), 3.65 (dd,  $J = 14.0, 1.5$  Hz, 1H), 3.12 (dd,  $J = 13.9, 1.8$  Hz, 1H).

$^{13}\text{C}$  NMR (100 MHz,  $\text{CDCl}_3$ )  $\delta$  164.96, 153.07, 148.10, 142.86, 136.19, 134.29, 128.13, 127.00, 126.20, 123.36, 123.19, 121.98, 117.66, 115.80, 83.42, 72.94, 52.96, 43.69.

HRMS (ESI)  $m/z$  Calcd for  $\text{C}_{20}\text{H}_{15}\text{N}_3\text{O}_3\text{S}$ ,  $[\text{M}+\text{H}]^+$  : 378.0907; Found: 378.0905 .

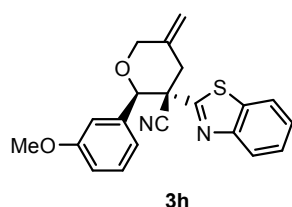

The compound **3h** was prepared according to the general procedure. The product was obtained as a white solid (29.0 mg, 80% yield). Melting point 96-98 °C.

$^1\text{H}$  NMR (400 MHz,  $\text{CDCl}_3$ )  $\delta$  8.07 (dt,  $J = 8.3, 0.9$  Hz, 1H), 7.79 (ddd,  $J = 8.0, 1.2, 0.6$  Hz, 1H), 7.53 (ddd,  $J = 8.3, 7.2, 1.2$  Hz, 1H), 7.41 (ddd,  $J = 8.2, 7.2, 1.2$  Hz, 1H), 7.01 (td,  $J = 7.8, 0.9$  Hz, 1H), 6.75 (dt,  $J = 9.2, 1.4$  Hz, 2H), 6.66 (dt,  $J = 7.6, 1.3$  Hz, 1H), 5.36 – 5.25 (m, 1H), 5.20 (t,  $J = 1.4$  Hz, 1H), 5.07 (s, 1H), 4.62 (dd,  $J = 12.5, 1.8$  Hz, 1H), 4.41 (d,  $J = 12.4$  Hz, 1H), 3.68 (dd,  $J = 14.0, 1.5$  Hz, 1H), 3.51 (s, 3H), 3.10 (dd,  $J = 14.0, 1.8$  Hz, 1H).

$^{13}\text{C}$  NMR (100 MHz,  $\text{CDCl}_3$ )  $\delta$  166.04, 159.23, 153.08, 137.30, 136.95, 134.59, 129.08, 126.63, 125.77, 123.18, 121.82, 119.33, 118.40, 115.75, 115.25, 111.30, 84.81, 73.03, 54.96, 53.22, 43.50.

HRMS (ESI)  $m/z$  Calcd for  $\text{C}_{21}\text{H}_{18}\text{N}_2\text{O}_2\text{S}$ ,  $[\text{M}+\text{H}]^+$  : 363.1162 ; Found: 363.1158.

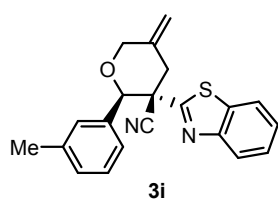

The compound **3i** was prepared according to the general procedure. The product was obtained as a white solid (31.2 mg, 90% yield). Melting point 133-135 °C.

$^1\text{H}$  NMR (400 MHz,  $\text{CDCl}_3$ )  $\delta$  8.07 (dt,  $J = 8.3, 0.9$  Hz, 1H), 7.78 (dt,  $J = 8.1, 0.9$  Hz, 1H), 7.53 (ddd,  $J = 8.3, 7.2, 1.3$  Hz, 1H), 7.49 – 7.36 (m, 1H), 7.06 (d,  $J = 1.9$  Hz, 1H), 7.05 – 6.93 (m, 2H), 6.90 – 6.77 (m, 1H), 5.28 (d,  $J = 1.6$  Hz, 1H), 5.24 – 5.12 (m, 1H), 5.05 (s, 1H), 4.61 (dd,  $J = 12.5, 1.8$  Hz, 1H), 4.40 (d,  $J = 12.6$  Hz, 1H), 3.68 (dq,  $J = 13.8, 1.8$  Hz, 1H), 3.10 (dd,  $J = 14.0, 1.8$  Hz, 1H), 2.16 (s, 3H).

$^{13}\text{C}$  NMR (100 MHz,  $\text{CDCl}_3$ )  $\delta$  166.02, 153.04, 137.86, 137.06, 135.82, 134.56, 129.59, 127.86, 127.56, 126.59, 125.72, 124.16, 123.22, 121.74, 118.37, 115.17, 84.88, 73.06, 53.23, 43.53, 21.29.

HRMS (ESI)  $m/z$  Calcd for  $\text{C}_{21}\text{H}_{18}\text{N}_2\text{OS}$ ,  $[\text{M}+\text{H}]^+$  : 347.1213; Found: 347.1211.

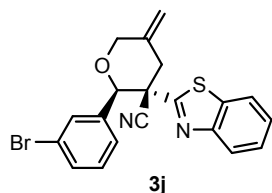

The compound **3j** was prepared according to the general procedure.



The product was obtained as a white solid (26.7 mg, 65% yield). Melting point 137-139 °C.

**<sup>1</sup>H NMR (400 MHz, CDCl<sub>3</sub>)** δ 8.08 (d, *J* = 8.2 Hz, 1H), 7.81 (d, *J* = 8.1 Hz, 1H), 7.55 (ddd, *J* = 8.3, 7.2, 1.3 Hz, 1H), 7.50 – 7.38 (m, 1H), 7.34 (d, *J* = 3.8 Hz, 2H), 7.05 – 6.91 (m, 2H), 5.29 (d, *J* = 1.7 Hz, 1H), 5.22 – 5.17 (m, 1H), 5.08 (s, 1H), 4.61 (dd, *J* = 12.6, 1.8 Hz, 1H), 4.39 (d, *J* = 12.6 Hz, 1H), 3.64 (dd, *J* = 14.0, 1.6 Hz, 1H), 3.10 (dd, *J* = 14.0, 1.8 Hz, 1H).

**<sup>13</sup>C NMR (100 MHz, CDCl<sub>3</sub>)** δ 165.48, 153.05, 138.10, 136.60, 134.43, 131.95, 130.20, 129.56, 126.77, 125.94, 125.60, 123.30, 122.21, 121.85, 117.95, 115.50, 83.82, 73.00, 53.09, 43.56.

**HRMS (ESI)** *m/z* Calcd for C<sub>20</sub>H<sub>15</sub>BrN<sub>2</sub>OS, [M+H]<sup>+</sup> : 411.0161; Found: 411.0163.

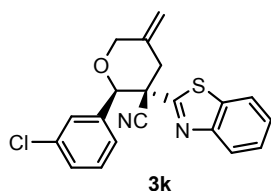

The compound **3k** was prepared according to the general procedure. The product was obtained as a white solid (30.4 mg, 83% yield). Melting point 130-132 °C.

**<sup>1</sup>H NMR (400 MHz, CDCl<sub>3</sub>)** δ 8.07 (dt, *J* = 8.3, 0.9 Hz, 1H), 7.81 (dt, *J* = 8.0, 0.9 Hz, 1H), 7.55 (ddd, *J* = 8.4, 7.3, 1.2 Hz, 1H), 7.43 (ddd, *J* = 8.3, 7.2, 1.2 Hz, 1H), 7.23 – 7.13 (m, 2H), 7.04 (t, *J* = 7.8 Hz, 1H), 6.94 (dt, *J* = 7.9, 1.4 Hz, 1H), 5.29 (q, *J* = 1.5 Hz, 1H), 5.24 – 5.14 (m, 1H), 5.09 (s, 1H), 4.61 (dd, *J* = 12.6, 1.8 Hz, 1H), 4.40 (d, *J* = 12.6 Hz, 1H), 3.76 – 3.45 (m, 1H), 3.10 (dd, *J* = 13.9, 1.9 Hz, 1H).

**<sup>13</sup>C NMR (100 MHz, CDCl<sub>3</sub>)** δ 165.50, 153.05, 137.90, 136.62, 134.44, 134.12, 129.27, 129.03, 127.33, 126.76, 125.93, 125.18, 123.30, 121.83, 117.97, 115.45, 83.87, 72.99, 53.07, 43.61.

**HRMS (ESI)** *m/z* Calcd for C<sub>20</sub>H<sub>15</sub>ClN<sub>2</sub>OS, [M+H]<sup>+</sup> : 367.0666; Found: 367.0661.

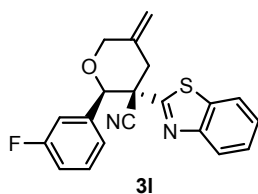

The compound **3l** was prepared according to the general procedure. The product was obtained as a white solid (32.2 mg, 92% yield). Melting point 155-157 °C.

**<sup>1</sup>H NMR (400 MHz, CDCl<sub>3</sub>)** δ 8.07 (dt, *J* = 8.2, 0.8 Hz, 1H), 7.87 – 7.70 (m, 1H), 7.55 (ddd, *J* = 8.3, 7.2, 1.3 Hz, 1H), 7.43 (ddd, *J* = 8.2, 7.2, 1.2 Hz, 1H), 7.08 (td, *J* = 8.0, 5.8 Hz, 1H), 7.03 – 6.87 (m, 2H), 6.83 (dt, *J* = 7.8, 1.3 Hz, 1H), 5.29 (q, *J* = 1.5 Hz, 1H), 5.23 – 5.15 (m, 1H), 5.12 (s, 1H), 4.61 (dd, *J* = 12.6, 1.8 Hz, 1H), 4.40 (d, *J* = 12.5 Hz, 1H), 3.65 (dq, *J* = 14.0, 1.8 Hz, 1H), 3.10 (dd, *J* = 13.9, 1.9 Hz, 1H).

**<sup>13</sup>C NMR (100 MHz, CDCl<sub>3</sub>)** δ 165.57, 163.59, 161.14, 153.07, 138.41, 138.34, 136.65, 134.45, 129.62, 129.54, 126.76, 125.92, 123.30, 122.75, 122.72, 121.84, 118.05, 115.95, 115.74, 115.42, 114.41, 114.18, 83.90, 72.98, 53.07, 43.68.

**HRMS (ESI)** *m/z* Calcd for C<sub>20</sub>H<sub>15</sub>FN<sub>2</sub>OS, [M+H]<sup>+</sup> : 351.0962; Found: 351.0966.

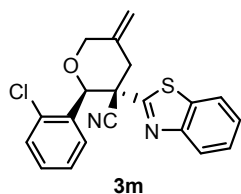

The compound **3m** was prepared according to the general procedure. The product was obtained as a white solid (31.5 mg, 86% yield). Melting point 161-163 °C.

**<sup>1</sup>H NMR (400 MHz, CDCl<sub>3</sub>)** δ 8.05 – 7.99 (m, 2H), 7.77 (dt, *J* = 8.0, 0.9 Hz, 1H), 7.50 (ddd, *J* = 8.3, 7.2, 1.3 Hz, 1H), 7.40 (tdd, *J* = 7.2, 3.6, 1.3 Hz, 2H), 7.23 (dd, *J* = 7.4, 1.7 Hz, 1H), 7.07 (dd, *J* = 8.0, 1.3 Hz, 1H), 5.42 (s, 1H), 5.29 (d, *J* = 1.6 Hz, 1H), 5.26 – 5.19 (m, 1H), 4.59 (dd, *J* = 12.5, 1.8 Hz, 1H), 4.41 (d, *J* = 12.6 Hz, 1H), 3.94 (dq, *J* = 14.1, 1.8 Hz, 1H), 3.16 (dd, *J* = 14.1, 1.9 Hz, 1H).

**<sup>13</sup>C NMR (100 MHz, CDCl<sub>3</sub>)** δ 163.86, 152.65, 136.99, 135.55, 133.77, 133.72, 130.22, 129.43, 128.71, 127.24, 126.52, 125.77, 123.54, 121.62, 118.57, 115.36, 80.05, 73.18, 52.49, 42.42.

**HRMS (ESI)** *m/z* Calcd for C<sub>20</sub>H<sub>15</sub>ClN<sub>2</sub>OS, [M+H]<sup>+</sup> : 367.0666; Found: 367.0662.

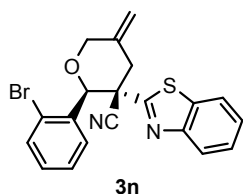

The compound **3n** was prepared according to the general procedure. The

product was obtained as a white solid (26.3 mg, 64% yield). Melting point 164-166 °C.

**<sup>1</sup>H NMR (400 MHz, CDCl<sub>3</sub>)** δ 8.09 – 7.91 (m, 2H), 7.83 – 7.69 (m, 1H), 7.57 – 7.34 (m, 3H), 7.29 (dd, *J* = 8.0, 1.4 Hz, 1H), 7.18 (td, *J* = 7.8, 1.7 Hz, 1H), 5.39 (s, 1H), 5.29 (d, *J* = 1.4 Hz, 1H), 5.25 – 5.18 (m, 1H), 4.59 (dd, *J* = 12.6, 1.8 Hz, 1H), 4.41 (d, *J* = 12.5 Hz, 1H), 3.94 (dd, *J* = 14.1, 1.6 Hz, 1H), 3.17 (dd, *J* = 14.1, 1.9 Hz, 1H).

**<sup>13</sup>C NMR (100 MHz, CDCl<sub>3</sub>)** δ 163.80, 152.59, 137.01, 135.77, 135.34, 132.11, 130.55, 129.76, 127.84, 126.51, 125.77, 124.38, 123.58, 121.62, 118.61, 115.38, 82.40, 73.21, 52.42, 42.43.

**HRMS (ESI)** *m/z* Calcd for C<sub>20</sub>H<sub>15</sub>BrN<sub>2</sub>OS, [M+H]<sup>+</sup> : 411.0161; Found: 411.0164.

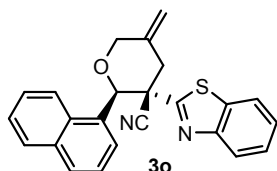

The compound **3o** was prepared according to the general procedure. The product was obtained as a white solid (29.1 mg, 76% yield). Melting point 178-180 °C.

**<sup>1</sup>H NMR (400 MHz, CDCl<sub>3</sub>)** δ 8.10 (dd, *J* = 7.3, 1.2 Hz, 1H), 8.02 (dd, *J* = 8.6, 1.1 Hz, 1H), 7.78 (d, *J* = 8.1 Hz, 1H), 7.63 (dd, *J* = 8.2, 1.3 Hz, 1H), 7.57 (t, *J* = 7.8 Hz, 1H), 7.45 (dtd, *J* = 7.4, 2.9, 1.3 Hz, 3H), 7.26 – 7.20 (m, 1H), 7.07 (ddd, *J* = 8.0, 6.8, 1.0 Hz, 1H), 6.79 (ddd, *J* = 8.4, 6.8, 1.4 Hz, 1H), 5.78 (s, 1H), 5.34 (q, *J* = 1.5 Hz, 1H), 5.29 – 5.21 (m, 1H), 4.69 (dd, *J* = 12.6, 1.8 Hz, 1H), 4.52 (d, *J* = 12.6 Hz, 1H), 4.16 – 3.93 (m, 1H), 3.20 (dd, *J* = 14.1, 1.8 Hz, 1H).

**<sup>13</sup>C NMR (100 MHz, CDCl<sub>3</sub>)** δ 165.09, 152.64, 137.25, 135.14, 132.62, 131.99, 130.53, 129.50, 128.38, 126.34, 125.94, 125.46, 125.31, 124.96, 123.10, 121.80, 121.35, 118.78, 115.28, 112.73, 79.97, 73.48, 53.52, 42.99.

**HRMS (ESI)** *m/z* Calcd for C<sub>24</sub>H<sub>18</sub>N<sub>2</sub>OS, [M+H]<sup>+</sup> : 383.1213; Found: 383.1221.

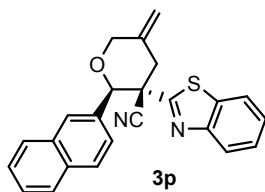

The compound **3p** was prepared according to the general procedure. The product was obtained as a white solid (32.5 mg, 85% yield). Melting point 128-130 °C.

**<sup>1</sup>H NMR (400 MHz, CDCl<sub>3</sub>)** δ 8.11 (d, *J* = 8.2 Hz, 1H), 7.79 – 7.69 (m, 3H), 7.68 – 7.60 (m, 1H), 7.61 – 7.49 (m, 2H), 7.48 – 7.32 (m, 3H), 7.16 (dd, *J* = 8.5, 1.7 Hz, 1H), 5.32 (d, *J* = 1.8 Hz, 1H), 5.28 (s, 1H), 5.24 (d, *J* = 1.9 Hz, 1H), 4.67 (dd, *J* = 12.6, 1.8 Hz, 1H), 4.47 (d, *J* = 12.5 Hz, 1H), 3.74 (dq, *J* = 14.0, 1.7 Hz, 1H), 3.14 (dd, *J* = 13.9, 1.9 Hz, 1H).

**<sup>13</sup>C NMR (100 MHz, CDCl<sub>3</sub>)** δ 165.93, 153.09, 137.02, 134.56, 133.50, 133.39, 132.80, 128.42, 127.71, 127.54, 126.73, 126.64, 126.37, 126.06, 125.76, 124.48, 123.24, 121.82, 118.38, 115.28, 84.81, 73.14, 53.38, 43.71.

**HRMS (ESI)** *m/z* Calcd for C<sub>24</sub>H<sub>18</sub>N<sub>2</sub>OS, [M+H]<sup>+</sup> : 383.1213; Found: 383.1212.

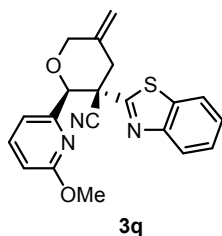

The compound **3q** was prepared according to the general procedure. The product was obtained as a white solid (32.3 mg, 89% yield). Melting point 160-162 °C.

**<sup>1</sup>H NMR (400 MHz, CDCl<sub>3</sub>)** δ 8.01 (d, *J* = 8.1 Hz, 1H), 7.86 – 7.68 (m, 1H), 7.65 – 7.45 (m, 2H), 7.45 – 7.34 (m, 1H), 7.16 (d, *J* = 7.3 Hz, 1H), 6.55 (d, *J* = 8.3 Hz, 1H), 5.27 (d, *J* = 1.8 Hz, 1H), 5.21 – 5.18 (m, 1H), 5.15 (s, 1H), 4.61 (dd, *J* = 12.5, 1.8 Hz, 1H), 4.42 (d, *J* = 12.5 Hz, 1H), 3.65 (dd, *J* = 13.9, 1.5 Hz, 1H), 3.14 (d, *J* = 1.8 Hz, 1H), 3.11 (s, 3H).

**<sup>13</sup>C NMR (100 MHz, CDCl<sub>3</sub>)** δ 166.12, 162.58, 153.20, 152.70, 139.13, 136.85, 134.71, 126.50, 125.59, 123.17, 121.63, 118.47, 115.24, 115.10, 111.09, 84.76, 72.89, 52.69, 51.68, 43.89.

**HRMS (ESI)**  $m/z$  Calcd for  $C_{20}H_{17}N_3O_2S$ ,  $[M+H]^+$  : 364.1114; Found: 364.1119.

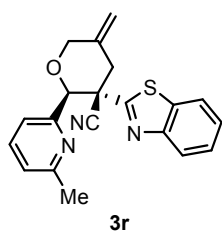

The compound **3r** was prepared according to the general procedure. The product was obtained as a white solid (32.0 mg, 92% yield). Melting point 163-165 °C.

**$^1H$  NMR (400 MHz,  $CDCl_3$ )**  $\delta$  8.03 (d,  $J$  = 8.1 Hz, 1H), 7.81 (dd,  $J$  = 8.1, 1.2 Hz, 1H), 7.56 (t,  $J$  = 7.7 Hz, 1H), 7.49 (ddd,  $J$  = 8.3, 7.2, 1.3 Hz, 1H), 7.43 – 7.35 (m, 2H), 6.95 (d,  $J$  = 7.6 Hz, 1H), 5.27 (d,  $J$  = 1.7 Hz, 1H), 5.23 – 5.19 (m, 1H), 5.18 (s, 1H), 4.62 (dd,  $J$  = 12.5, 1.8 Hz, 1H), 4.43 (d,  $J$  = 12.5 Hz, 1H), 3.68 (dq,  $J$  = 13.9, 1.8 Hz, 1H), 3.13 (dd,  $J$  = 13.9, 1.8 Hz, 1H), 1.98 (s, 3H).

**$^{13}C$  NMR (100 MHz,  $CDCl_3$ )**  $\delta$  166.09, 156.98, 154.54, 153.02, 136.91, 136.89, 134.76, 126.30, 125.48, 123.38, 123.00, 121.42, 118.90, 118.35, 115.23, 85.40, 72.95, 51.97, 43.47, 23.69.

**HRMS (ESI)**  $m/z$  Calcd for  $C_{20}H_{17}N_3OS$ ,  $[M+H]^+$  : 348.1165; Found: 348.1166.

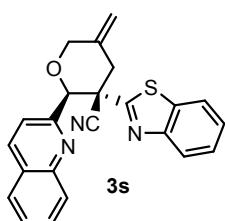

The compound **3s** was prepared according to the general procedure. The product was obtained as a white solid (33.4 mg, 87% yield). Melting point 206-208 °C.

**$^1H$  NMR (400 MHz,  $CDCl_3$ )**  $\delta$  8.15 (d,  $J$  = 8.6 Hz, 1H), 8.01 (d,  $J$  = 8.2 Hz, 1H), 7.75 (dd,  $J$  = 11.1, 8.2 Hz, 3H), 7.47 (ddd,  $J$  = 17.5, 11.2, 8.0, 3.4 Hz, 4H), 7.41 – 7.33 (m, 1H), 5.47 (s, 1H), 5.38 – 5.26 (m, 1H), 5.23 (d,  $J$  = 1.9 Hz, 1H), 4.68 (dd,  $J$  = 12.5, 1.8 Hz, 1H), 4.51 (d,  $J$  = 12.5 Hz, 1H), 3.71 (dt,  $J$  = 14.2, 2.0 Hz, 1H), 3.18 (dd,  $J$  = 13.9, 1.8 Hz, 1H).

**$^{13}C$  NMR (100 MHz,  $CDCl_3$ )**  $\delta$  166.49, 155.24, 153.04, 146.61, 136.86, 136.81, 134.80, 129.38, 129.24, 127.75, 127.41, 126.81, 126.30, 125.47, 123.31, 121.56, 119.55, 118.58, 115.32, 85.33, 73.04, 51.29, 43.98.

**HRMS (ESI)**  $m/z$  Calcd for  $C_{23}H_{17}N_3OS$ ,  $[M+H]^+$  : 348.1165; Found: 384.1163.

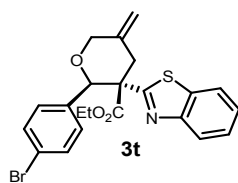

The compound **3t** was prepared according to the general procedure. The product was obtained as a white solid (28.0 mg, 61% yield). Melting point 97-99 °C.

**$^1H$  NMR (400 MHz,  $CDCl_3$ )**  $\delta$  8.07 (dt,  $J$  = 8.3, 0.9 Hz, 1H), 7.93 – 7.72 (m, 1H), 7.51 (ddd,  $J$  = 8.3, 7.2, 1.3 Hz, 1H), 7.41 (ddd,  $J$  = 8.2, 7.2, 1.2 Hz, 1H), 7.26 – 7.01 (m, 2H), 6.96 – 6.75 (m, 2H), 5.27 (s, 1H), 5.02 (d,  $J$  = 1.9 Hz, 1H), 4.96 (d,  $J$  = 2.0 Hz, 1H), 4.52 (d,  $J$  = 12.8 Hz, 1H), 4.40 (d,  $J$  = 12.7 Hz, 1H), 4.29 – 3.98 (m, 2H), 3.65 – 3.43 (m, 1H), 3.24 (d,  $J$  = 14.3 Hz, 1H), 1.20 (t,  $J$  = 7.1 Hz, 3H).

**$^{13}C$  NMR (100 MHz,  $CDCl_3$ )**  $\delta$  170.05, 169.58, 152.16, 139.59, 136.98, 135.28, 130.38, 129.07, 126.13, 125.34, 123.13, 121.73, 121.50, 111.63, 84.44, 72.65, 61.62, 59.09, 42.37, 13.90.

**HRMS (ESI)**  $m/z$  Calcd for  $C_{22}H_{20}BrNO_3S$ ,  $[M+H]^+$  : 458.0420; Found: 458.0421.

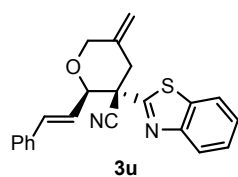

The compound **3u** was prepared according to the general procedure. The product was obtained as a brown solid (11.1 mg, 31% yield). Melting point 99-101 °C.

**$^1H$  NMR (400 MHz,  $DMSO-d_6$ )**  $\delta$  8.23 – 8.13 (m, 1H), 8.08 (d,  $J$  = 8.1 Hz, 1H), 7.62 – 7.55 (m, 1H), 7.54 – 7.47 (m, 1H), 7.40 – 7.14 (m, 5H), 6.58 (dd,  $J$  = 16.0, 1.2 Hz, 1H), 6.09 (dd,  $J$  = 15.9, 6.2 Hz, 1H), 5.23 (s, 1H), 5.17 (d,  $J$  = 1.9 Hz, 1H), 4.82 (dd,  $J$

= 6.3, 1.2 Hz, 1H), 4.46 (d,  $J = 12.2$  Hz, 1H), 4.38 (d,  $J = 12.4$  Hz, 1H), 3.40 (s, 1H), 3.26 – 3.10 (m, 1H), .

$^{13}\text{C}$  NMR (100 MHz, DMSO- $d_6$ )  $\delta$  166.42, 152.79, 138.15, 135.89, 134.60, 134.53, 129.18, 128.79, 127.39, 126.99, 126.49, 123.76, 123.54, 123.14, 118.82, 114.96, 81.62, 71.63, 52.49, 42.85.

HRMS (ESI)  $m/z$  Calcd for  $\text{C}_{22}\text{H}_{18}\text{N}_2\text{OS}$ ,  $[\text{M}+\text{H}]^+$  : 359.1213; Found:359.1210.

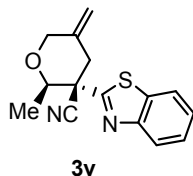

The compound **3v** was prepared according to the general procedure. The product was obtained as a brown solid (7.1 mg, 26% yield). Melting point 99-101 °C.

$^1\text{H}$  NMR (400 MHz,  $\text{CDCl}_3$ )  $\delta$  8.03 (dt,  $J = 8.2, 1.0$  Hz, 1H), 7.92 (dt,  $J = 8.0, 0.9$  Hz, 1H), 7.54 (ddd,  $J = 8.4, 7.2, 1.3$  Hz, 1H), 7.45 (ddd,  $J = 8.3, 7.2, 1.2$  Hz, 1H), 5.18 (q,  $J = 1.4$  Hz, 1H), 5.15 – 5.07 (m, 1H), 4.40 (dd,  $J = 12.4, 2.0$  Hz, 1H), 4.28 – 4.13 (m, 2H), 3.29 (dq,  $J = 14.1, 1.9$  Hz, 1H), 3.00 (dd,  $J = 13.9, 1.9$  Hz, 1H), 1.29 (d,  $J = 6.1$  Hz, 3H).

$^{13}\text{C}$  NMR (100 MHz,  $\text{CDCl}_3$ )  $\delta$  166.20, 153.28, 137.14, 134.33, 126.75, 125.91, 123.41, 121.79, 118.32, 114.71, 77.85, 72.30, 52.40, 43.71, 17.64.

HRMS (ESI)  $m/z$  Calcd for  $\text{C}_{15}\text{H}_{14}\text{N}_2\text{OS}$ ,  $[\text{M}+\text{H}]^+$  : 271.0900; Found: 271.0904.

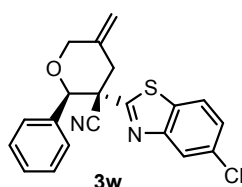

The compound **3w** was prepared according to the general procedure. The product was obtained as a white solid (34.9 mg, 95% yield). Melting point 159-161 °C.

$^1\text{H}$  NMR (400 MHz,  $\text{CDCl}_3$ )  $\delta$  8.06 (d,  $J = 2.0$  Hz, 1H), 7.68 (d,  $J = 8.6$  Hz, 1H), 7.39 (dd,  $J = 8.6, 2.0$  Hz, 1H), 7.22 (d,  $J = 6.7$  Hz, 1H), 7.19 – 7.07 (m, 4H), 5.29 (q,  $J = 1.4$  Hz, 1H), 5.23 – 5.17 (m, 1H), 5.06 (s, 1H), 4.61 (dd,  $J = 12.6, 1.8$  Hz, 1H), 4.41 (d,  $J = 12.6$  Hz, 1H), 3.65 (dd,  $J = 13.9, 1.6$  Hz, 1H), 3.09 (dd,  $J = 13.9, 1.8$  Hz, 1H).

$^{13}\text{C}$  NMR (100 MHz,  $\text{CDCl}_3$ )  $\delta$  168.01, 153.86, 136.77, 135.81, 132.78, 132.76, 128.97, 128.18, 126.97, 126.39, 123.15, 122.56, 118.16, 115.40, 84.81, 73.06, 53.38, 43.46.

HRMS (ESI)  $m/z$  Calcd for  $\text{C}_{20}\text{H}_{15}\text{ClN}_2\text{OS}$ ,  $[\text{M}+\text{H}]^+$  : 367.0666; Found:367.0664.

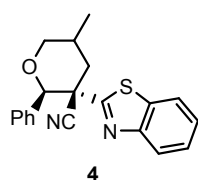

The compound **4** was prepared according to the general procedure. The product was obtained as a white solid (30.1 mg, 90% yield). Melting point 123-125 °C.

$^1\text{H}$  NMR (400 MHz,  $\text{CDCl}_3$ )  $\delta$  8.07 (dt,  $J = 8.2, 0.9$  Hz, 1H), 7.90 – 7.70 (m, 1H), 7.54 (d,  $J = 1.2$  Hz, 1H), 7.48 – 7.36 (m, 1H), 7.22 (dt,  $J = 5.3, 3.1$  Hz, 1H), 7.20 – 7.11 (m, 4H), 5.02 (s, 1H), 4.44 – 3.73 (m, 2H), 3.10 (dd,  $J = 14.2, 5.5$  Hz, 1H), 2.50 (d,  $J = 14.2$  Hz, 1H), 2.22 (dd,  $J = 3.6, 1.9$  Hz, 1H), 1.61 (d,  $J = 7.5$  Hz, 3H).

$^{13}\text{C}$  NMR (100 MHz,  $\text{CDCl}_3$ )  $\delta$  168.02, 153.19, 136.59, 134.59, 128.71, 128.03, 126.99, 126.58, 125.66, 123.23, 121.80, 120.67, 85.52, 74.17, 47.94, 41.06, 27.80, 18.26.

HRMS (ESI)  $m/z$  Calcd for  $\text{C}_{20}\text{H}_{18}\text{N}_2\text{OS}$ ,  $[\text{M}+\text{H}]^+$  : 334.1213; Found: 335.1214.

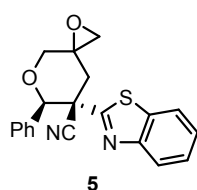

The compound **5** was prepared according to the general procedure. The product was obtained as a white solid (21.3 mg, 61% yield). Melting point 168-170 °C.

$^1\text{H}$  NMR (400 MHz,  $\text{CDCl}_3$ )  $\delta$  8.10 (d,  $J = 8.2$  Hz, 1H), 7.81 (dd,  $J = 8.2, 1.2$  Hz, 1H), 7.57 (ddd,  $J = 8.3, 7.1, 1.3$  Hz, 1H), 7.45 (ddd,  $J = 8.2, 7.2, 1.2$  Hz, 1H), 7.28 – 7.23 (m, 1H), 7.22 – 7.11 (m, 4H), 5.09 (s, 1H), 4.26 (dd,  $J = 11.6, 2.0$  Hz, 1H), 3.83 (dd,  $J = 11.6, 2.2$  Hz, 1H), 3.51 (dd,  $J = 13.4, 1.7$  Hz, 1H), 3.14 (ddd,  $J = 15.3, 4.7, 1.8$  Hz, 2H), 2.25 (dd,  $J =$

13.5, 2.2 Hz, 1H).

$^{13}\text{C}$  NMR (100 MHz,  $\text{CDCl}_3$ )  $\delta$  164.82, 152.99, 135.17, 134.51, 129.12, 128.22, 127.00, 126.76, 125.95, 123.43, 121.83, 118.33, 84.87, 72.77, 55.79, 53.11, 52.45, 41.74.

HRMS (ESI)  $m/z$  Calcd for  $\text{C}_{20}\text{H}_{16}\text{N}_2\text{O}_2\text{S}$ ,  $[\text{M}+\text{H}]^+$  : 349.1005; Found: 349.1002.

## 7. X-ray crystallographic analysis

The structure of **3a** was assigned by X-ray crystallographic analysis:

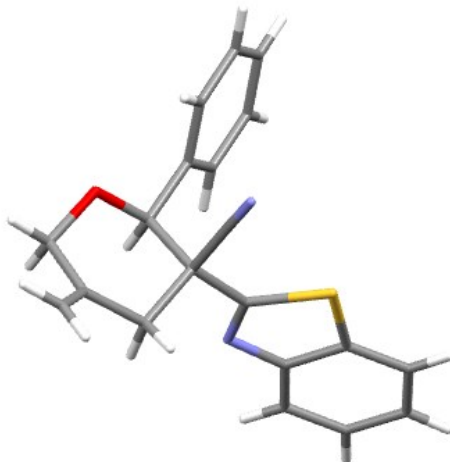

## 8. NMR spectra

8.084  
8.082  
8.080  
8.064  
8.061  
8.059  
7.790  
7.788  
7.785  
7.770  
7.768  
7.766  
7.599  
7.556  
7.541  
7.538  
7.536  
7.521  
7.518  
7.432  
7.429  
7.414  
7.411  
7.409  
7.394  
7.391  
7.260  
7.219  
7.208  
7.205  
7.197  
7.153  
7.142  
5.290  
5.287  
5.285  
5.283  
5.280  
5.206  
5.203  
5.200  
5.095  
4.633  
4.628  
4.602  
4.597  
4.429  
4.397  
3.703  
3.699  
3.668  
3.664  
3.119  
3.115  
3.085  
3.080

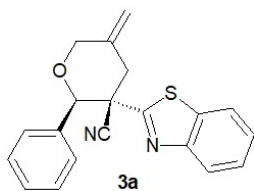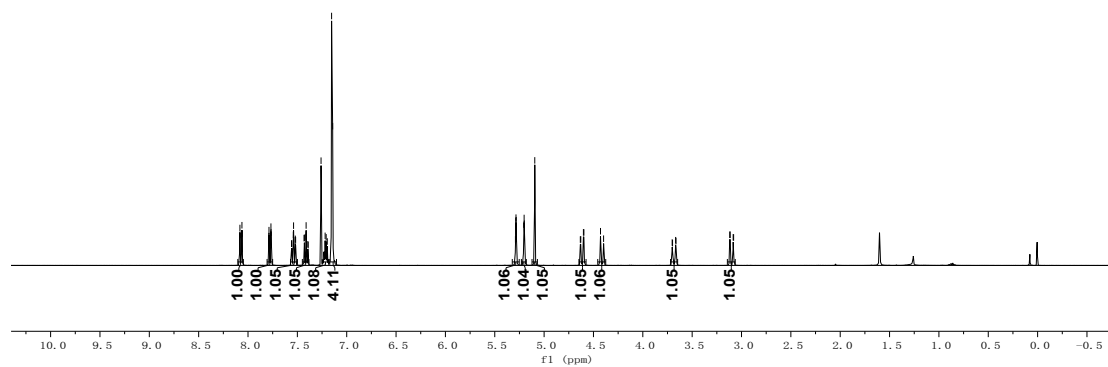

165.942  
153.079  
136.996  
135.957  
134.558  
128.873  
128.122  
127.035  
126.618  
125.752  
123.260  
121.803  
118.344  
115.201  
84.763  
77.366  
77.048  
76.730  
73.034  
53.253  
43.582

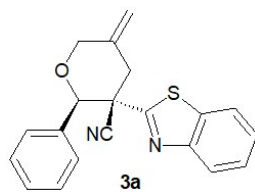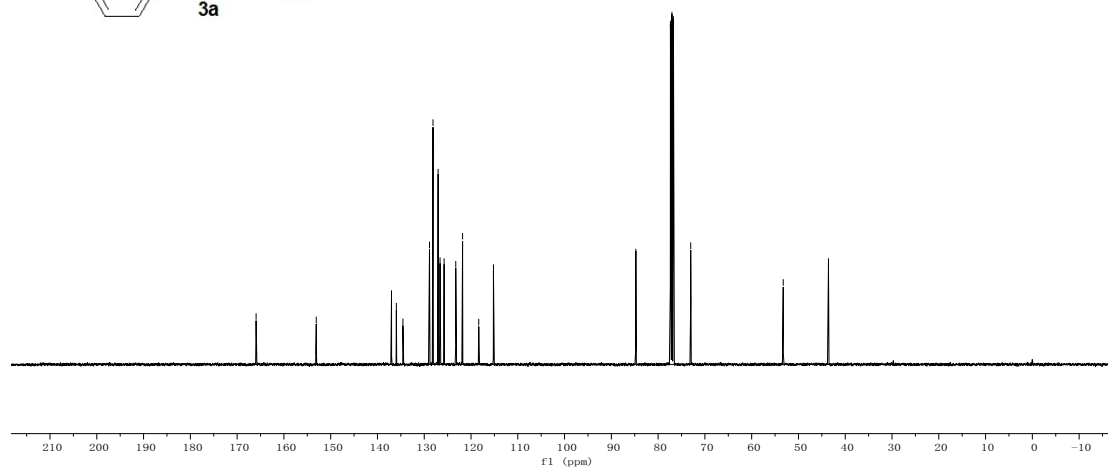

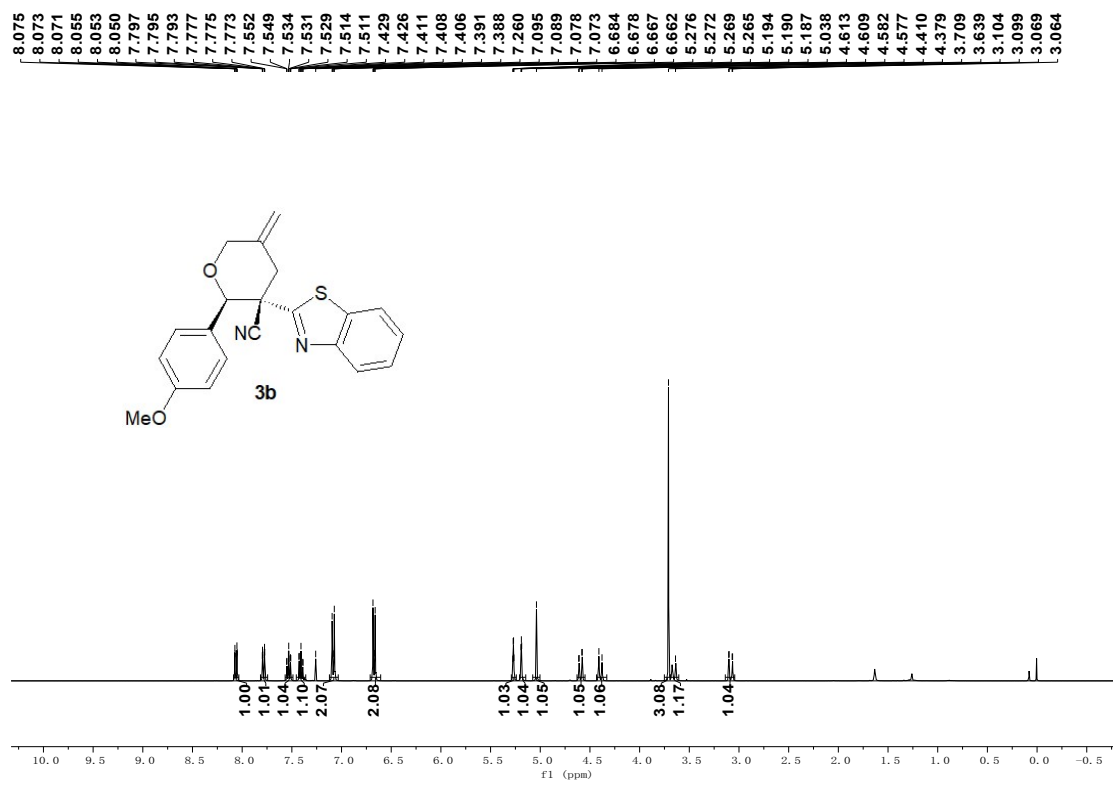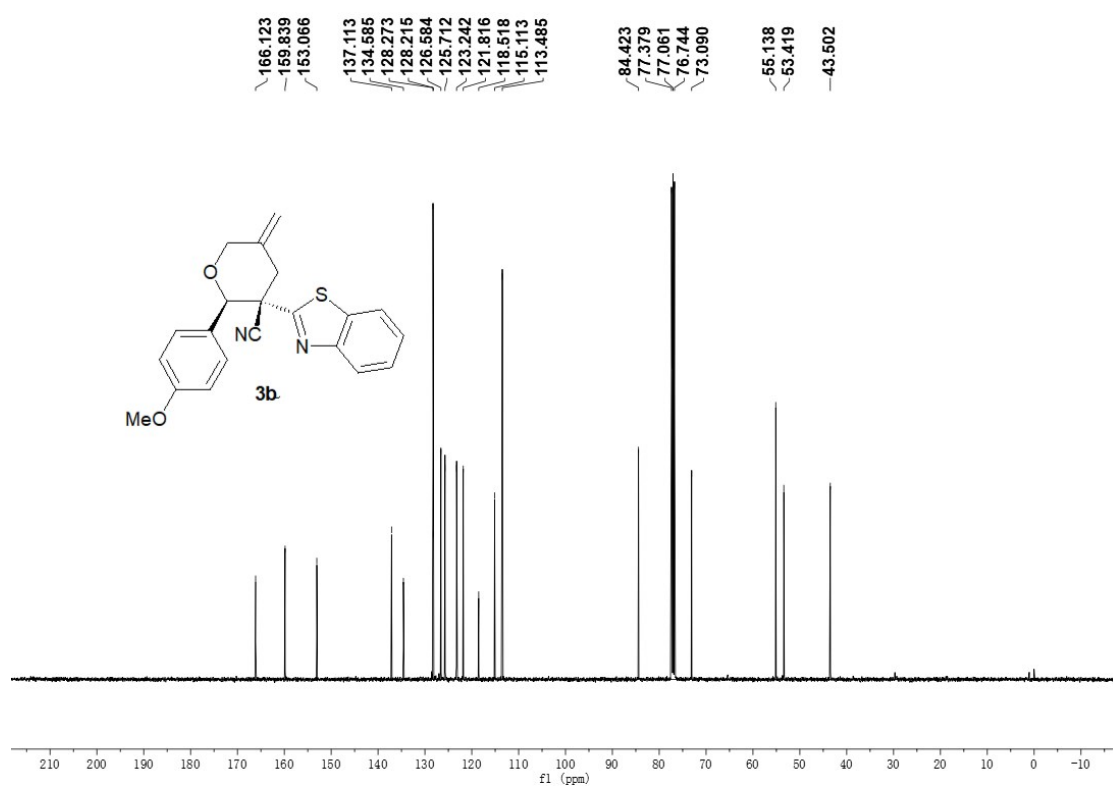

8.079  
8.077  
8.075  
8.059  
8.057  
8.054  
7.800  
7.797  
7.795  
7.779  
7.777  
7.775  
7.556  
7.552  
7.538  
7.535  
7.532  
7.517  
7.514  
7.431  
7.428  
7.413  
7.410  
7.408  
7.393  
7.390  
7.260  
7.046  
7.042  
7.031  
7.026  
6.957  
6.942  
6.937  
6.937  
5.277  
5.274  
5.270  
5.266  
5.194  
5.190  
5.187  
5.062  
4.617  
4.612  
4.585  
4.581  
4.412  
4.381  
3.678  
3.675  
3.644  
3.640  
3.107  
3.102  
3.072  
3.067  
2.235

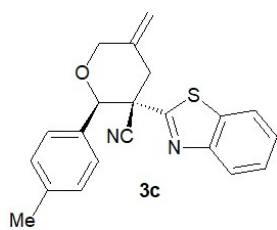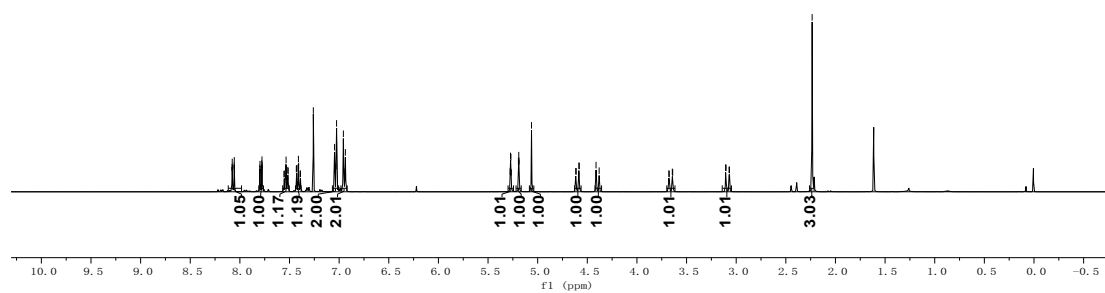

166.080  
153.080  
138.608  
137.098  
134.571  
133.011  
128.800  
126.894  
126.578  
125.696  
123.249  
121.802  
118.466  
115.081  
84.632  
77.369  
77.051  
76.734  
73.026  
53.317  
43.620  
21.181

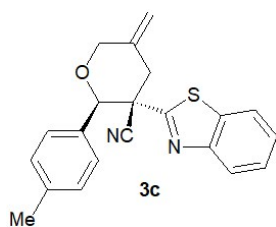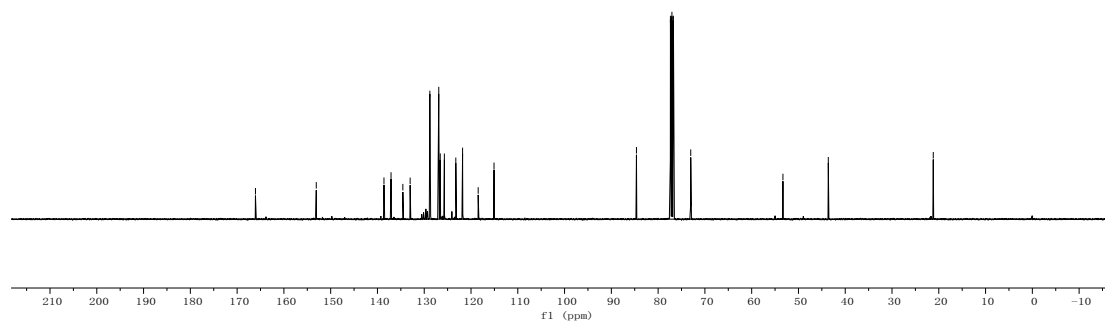



8.075  
8.055  
7.813  
7.811  
7.810  
7.793  
7.790  
7.566  
7.563  
7.548  
7.545  
7.542  
7.527  
7.524  
7.447  
7.444  
7.429  
7.426  
7.423  
7.409  
7.406  
7.260  
7.151  
7.145  
7.137  
7.129  
7.121  
7.115  
6.859  
6.854  
6.843  
6.837  
6.832  
6.821  
6.815  
5.290  
5.287  
5.283  
5.279  
5.207  
5.204  
5.201  
5.094  
4.622  
4.617  
4.591  
4.586  
4.420  
4.388  
3.670  
3.665  
3.635  
3.631  
3.114  
3.109  
3.079  
3.074

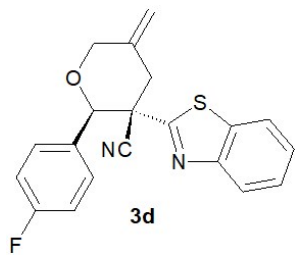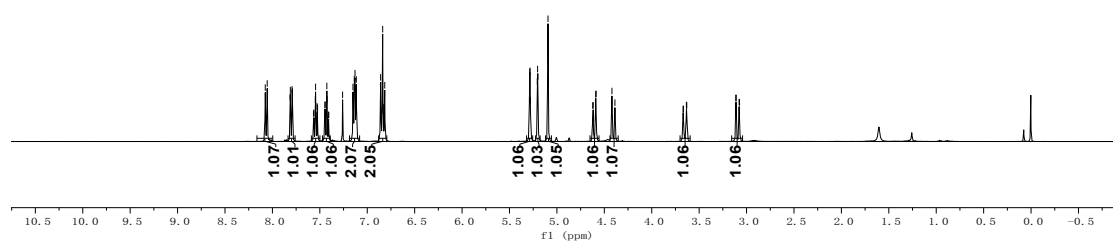

165.741  
164.122  
161.660  
153.066  
136.788  
134.469  
131.922  
131.891  
128.887  
128.802  
126.720  
125.882  
123.275  
121.849  
118.199  
115.353  
115.209  
114.993  
83.998  
77.361  
77.044  
76.726  
73.061  
53.289  
43.505

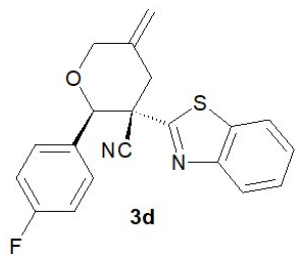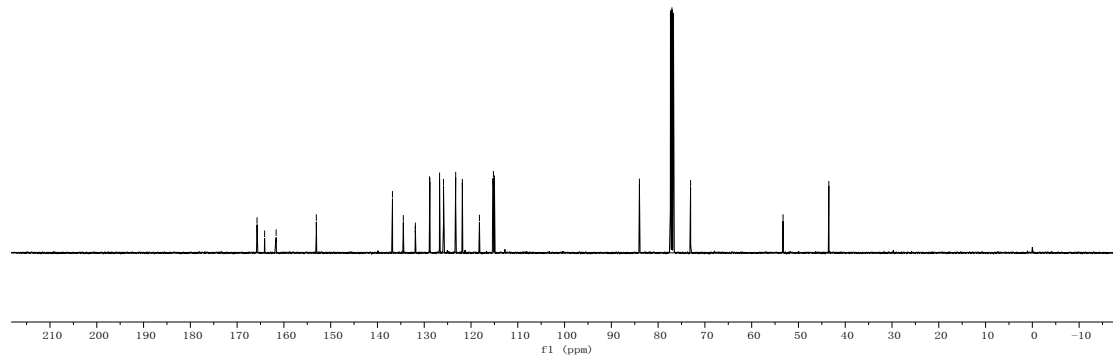

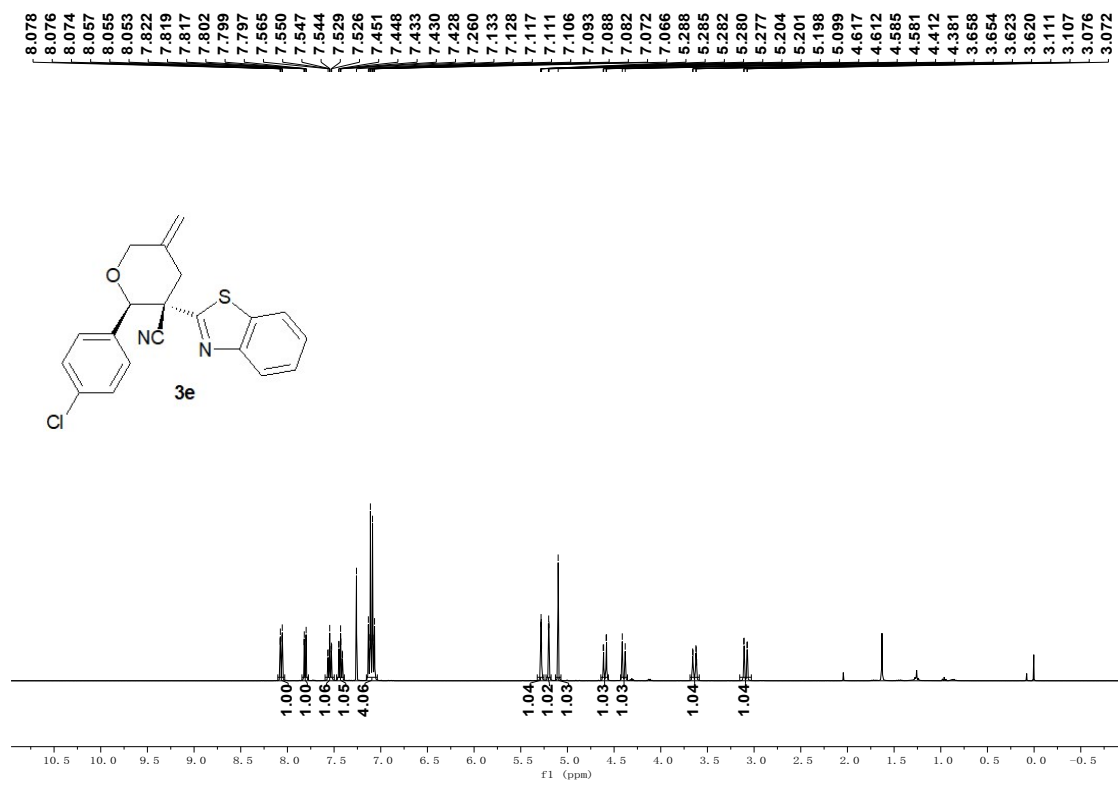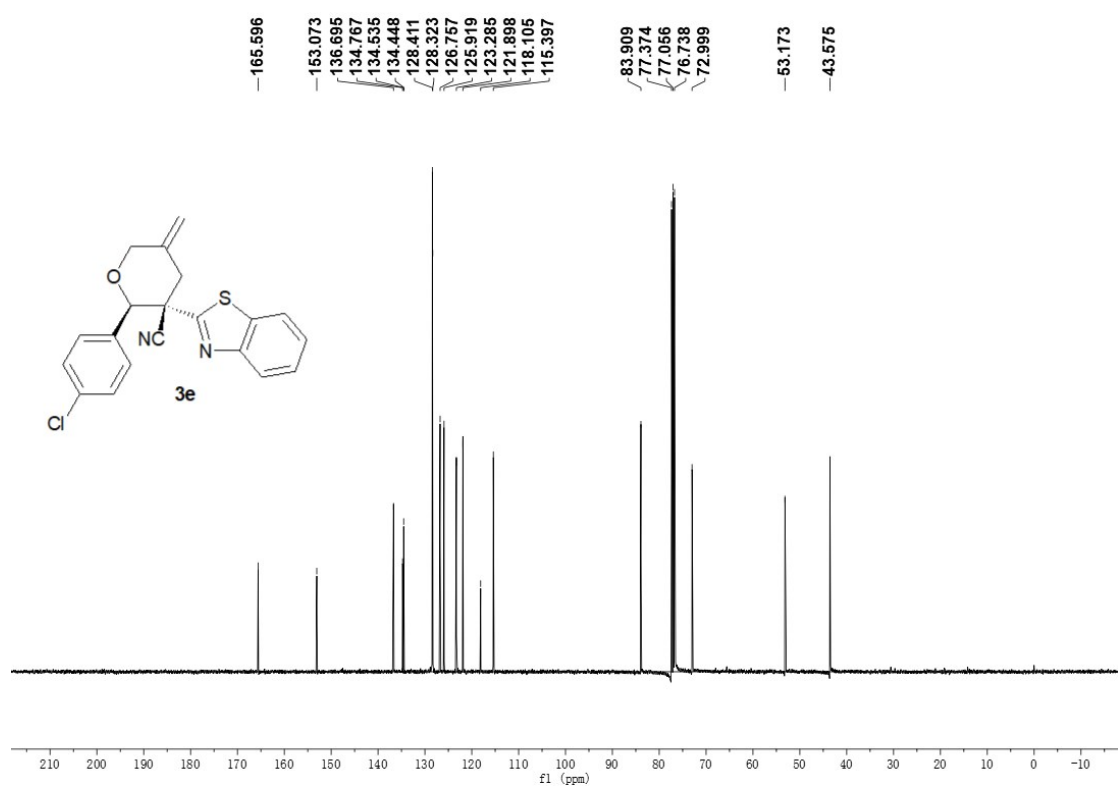

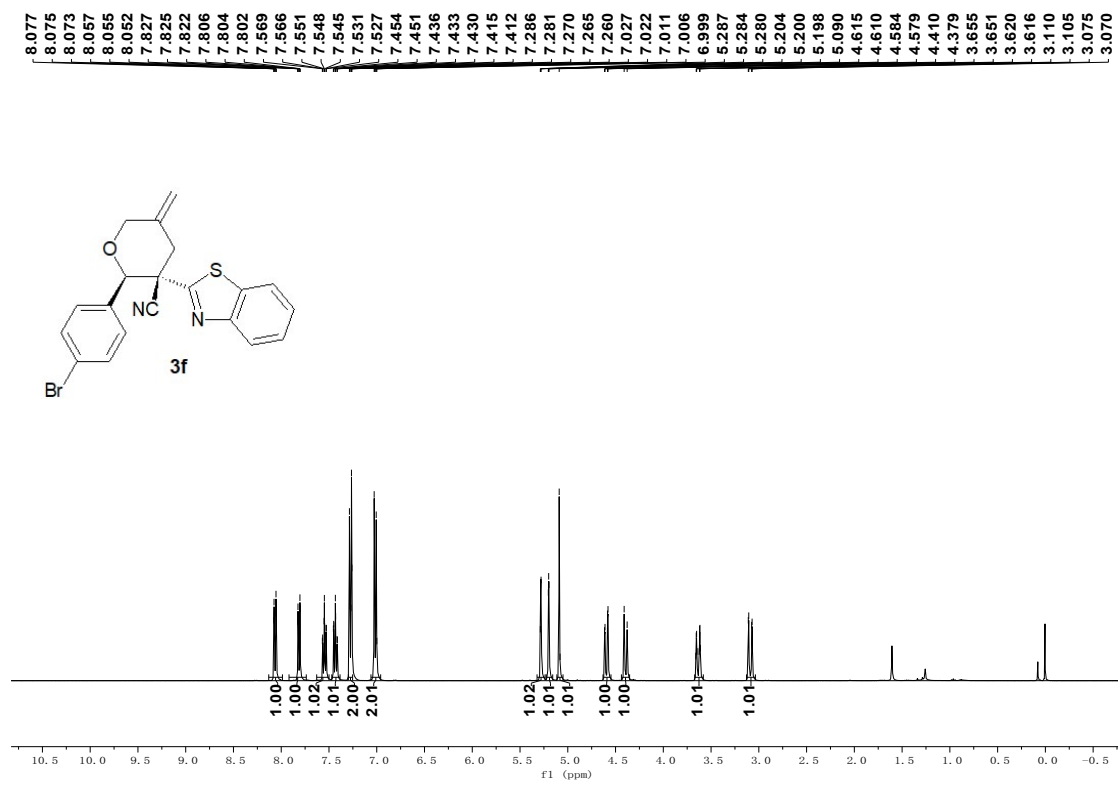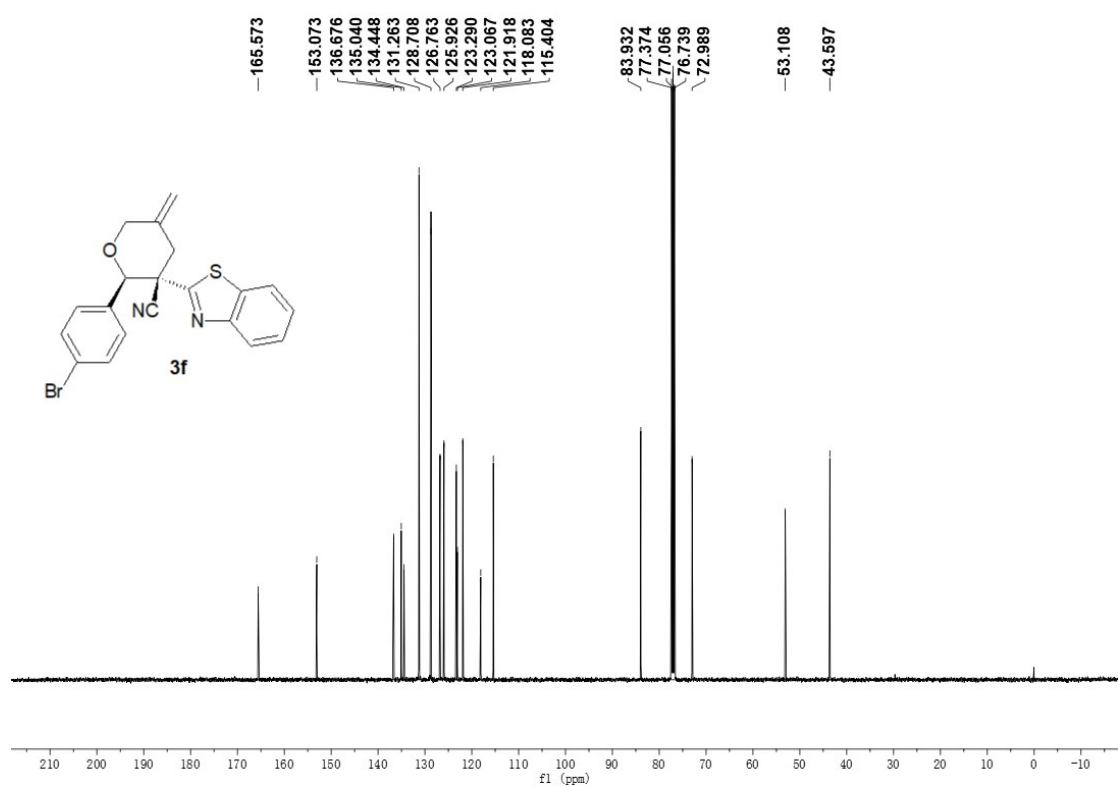

8.093  
8.091  
8.089  
8.072  
8.070  
8.068  
8.009  
8.004  
7.992  
7.987  
7.830  
7.827  
7.825  
7.810  
7.807  
7.805  
7.594  
7.590  
7.575  
7.573  
7.570  
7.555  
7.552  
7.477  
7.474  
7.459  
7.456  
7.454  
7.438  
7.321  
7.316  
7.304  
7.299  
7.260  
5.322  
5.319  
5.316  
5.314  
5.312  
5.267  
5.235  
5.232  
5.229  
4.651  
4.647  
4.620  
4.615  
4.442  
4.410  
3.666  
3.662  
3.631  
3.628  
3.144  
3.139  
3.109  
3.104

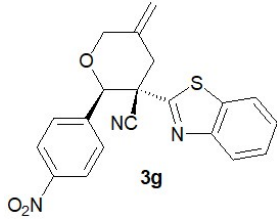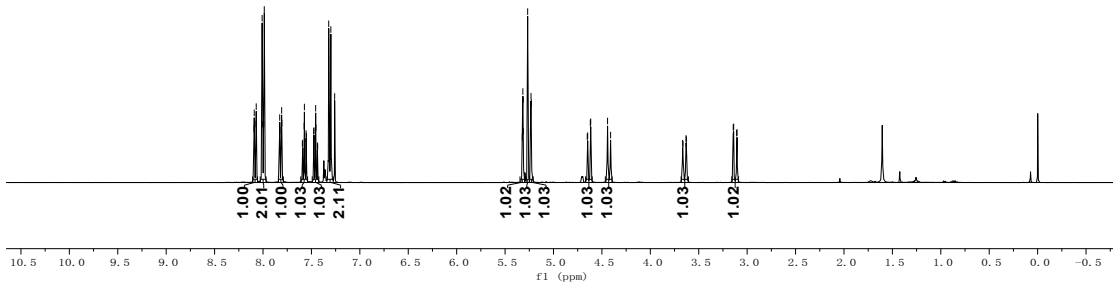

164.961  
153.067  
148.096  
142.863  
136.189  
134.289  
128.129  
126.995  
126.201  
123.364  
123.191  
121.976  
117.665  
115.801  
83.419  
77.363  
77.045  
76.728  
72.940  
52.963  
43.690

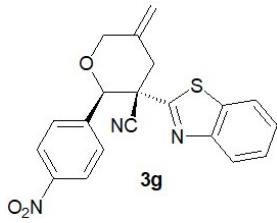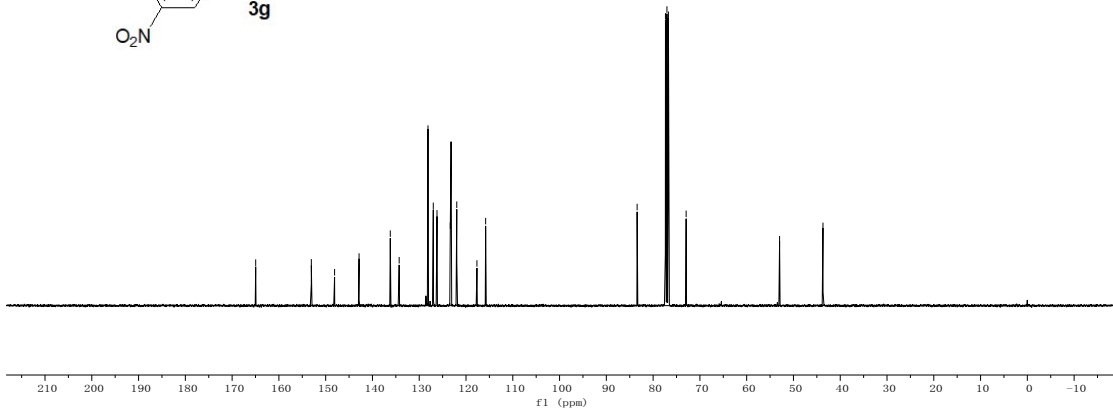

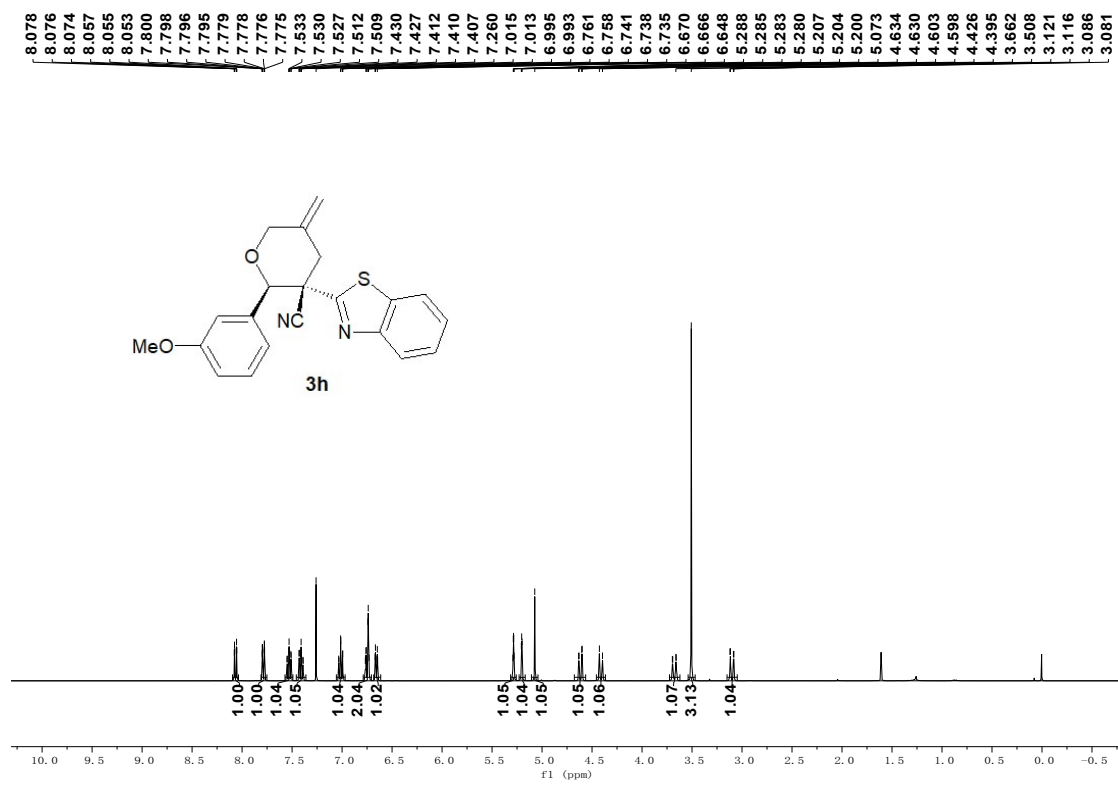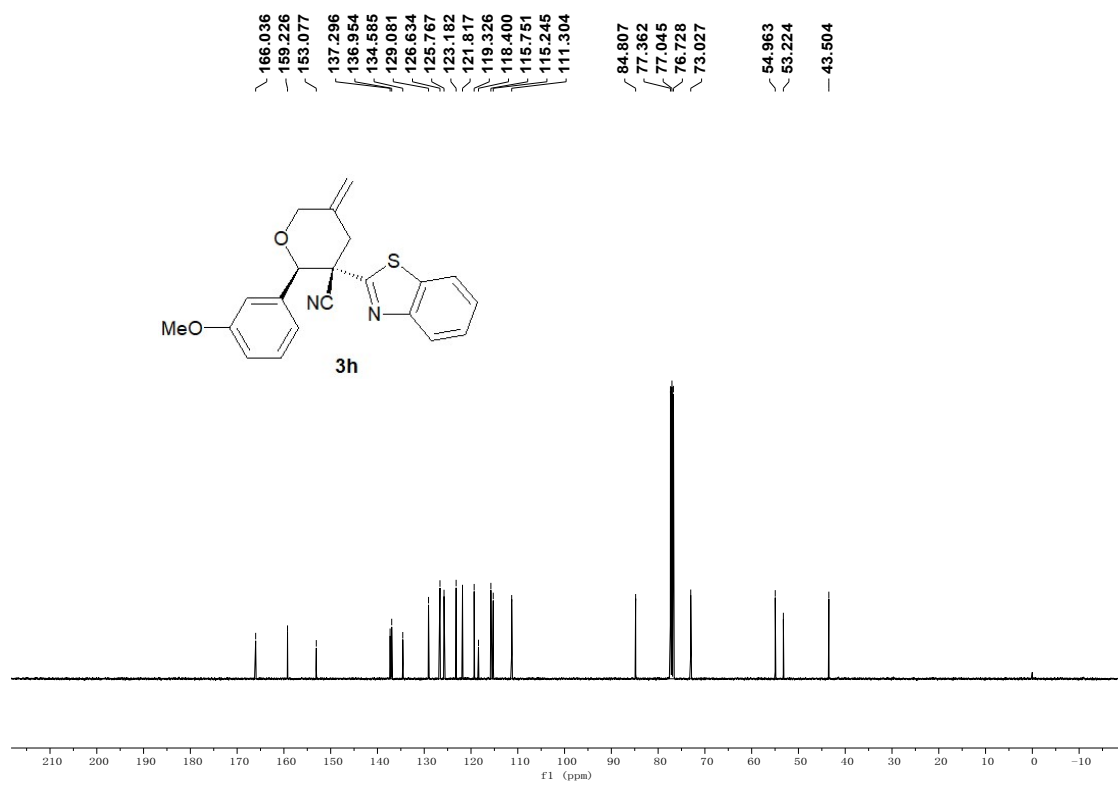

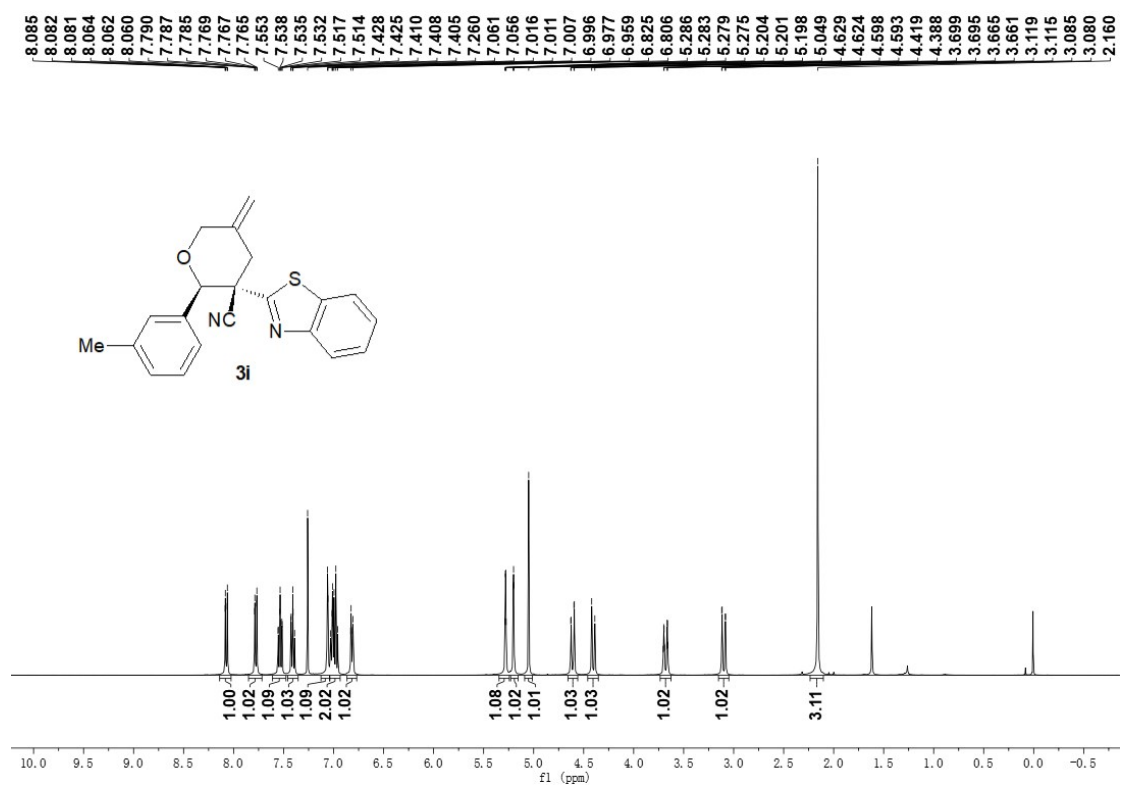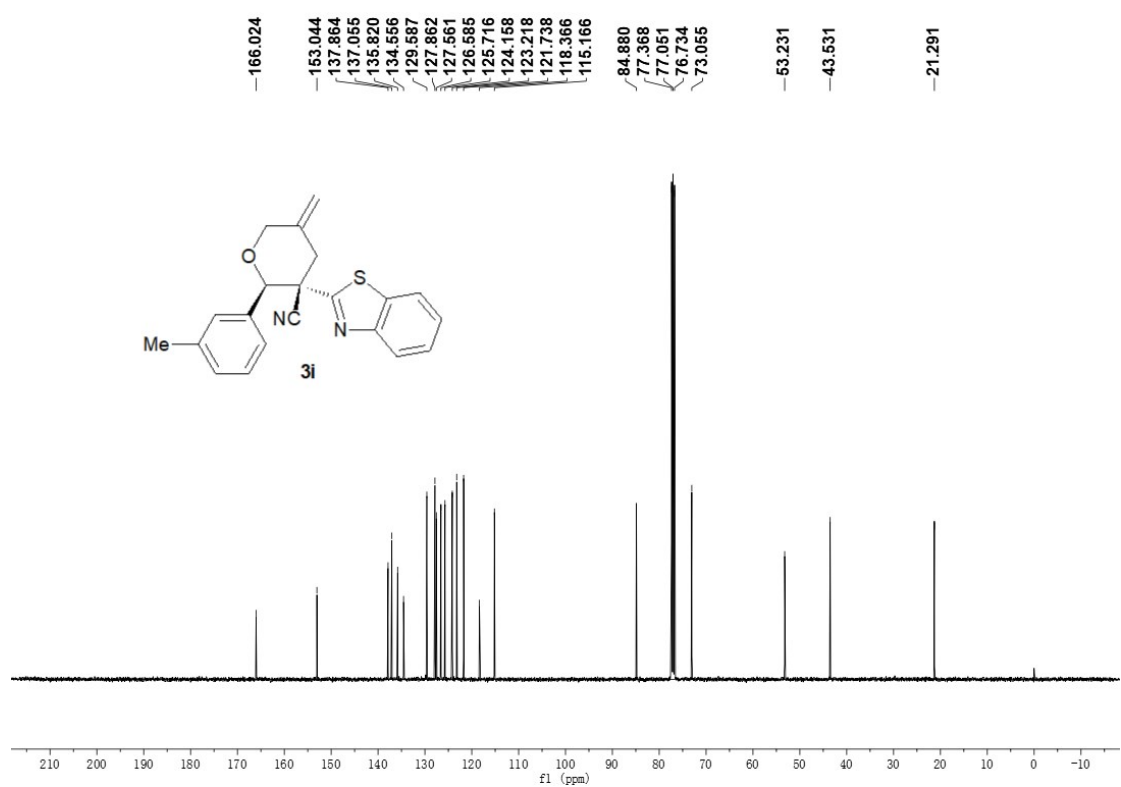

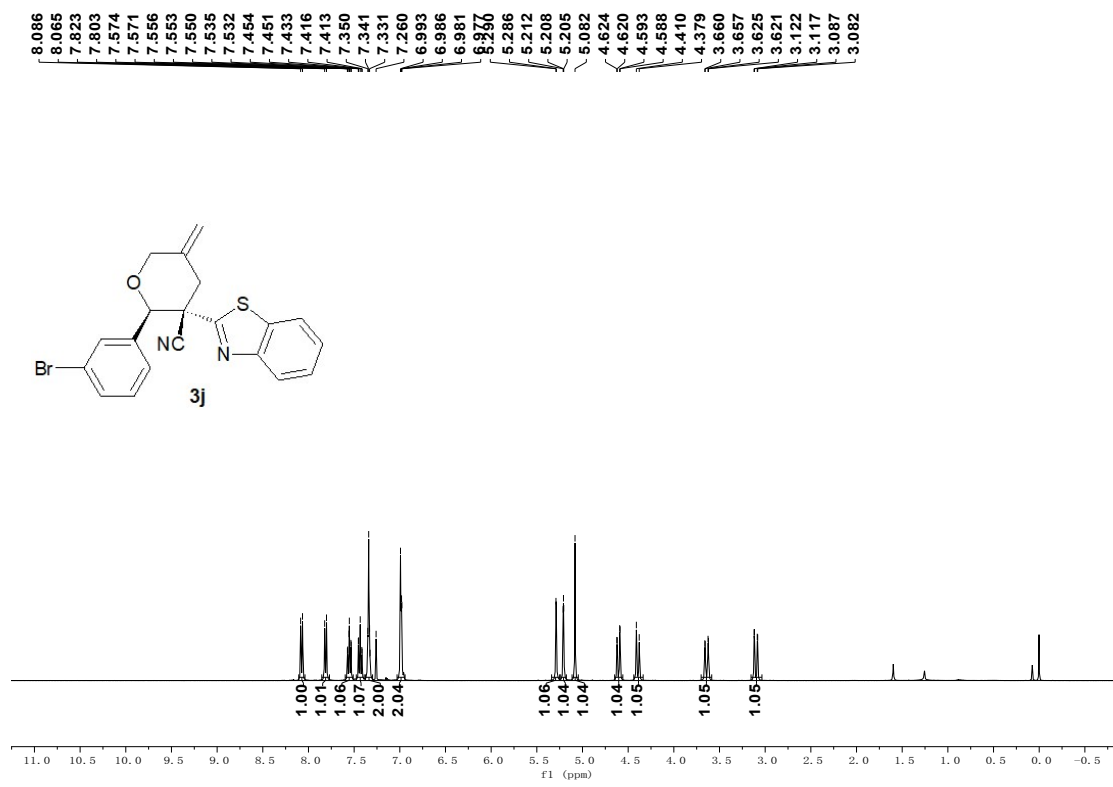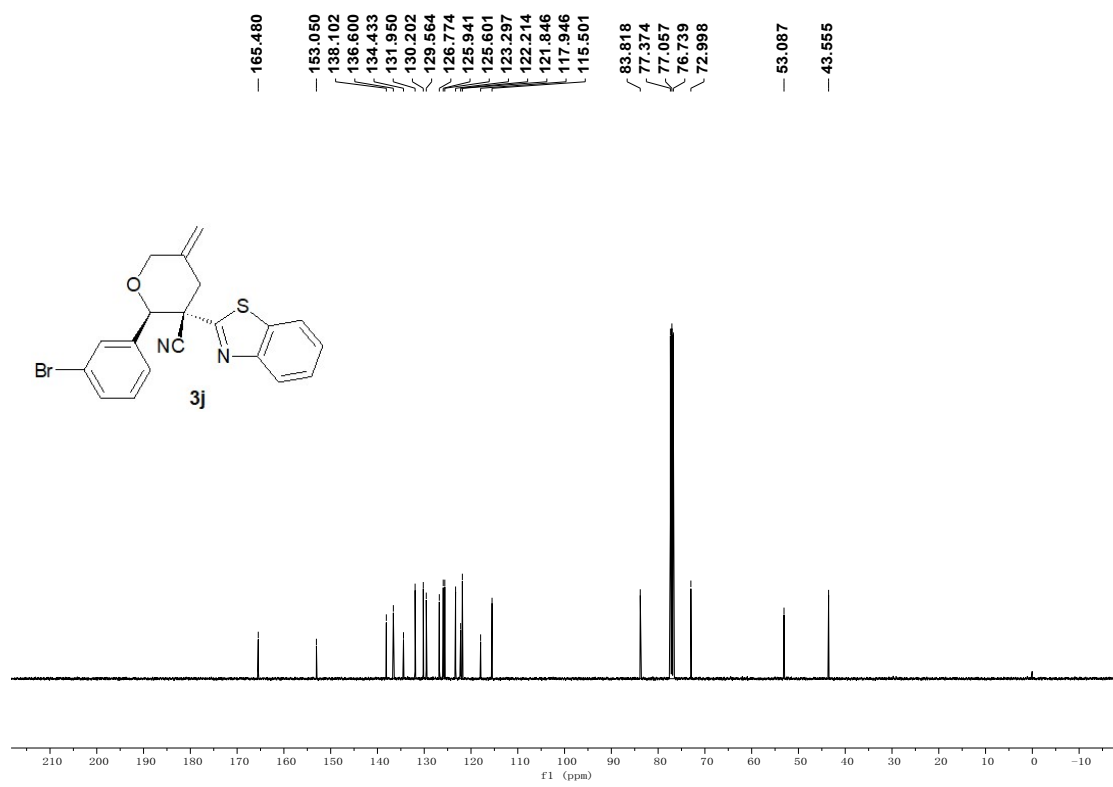

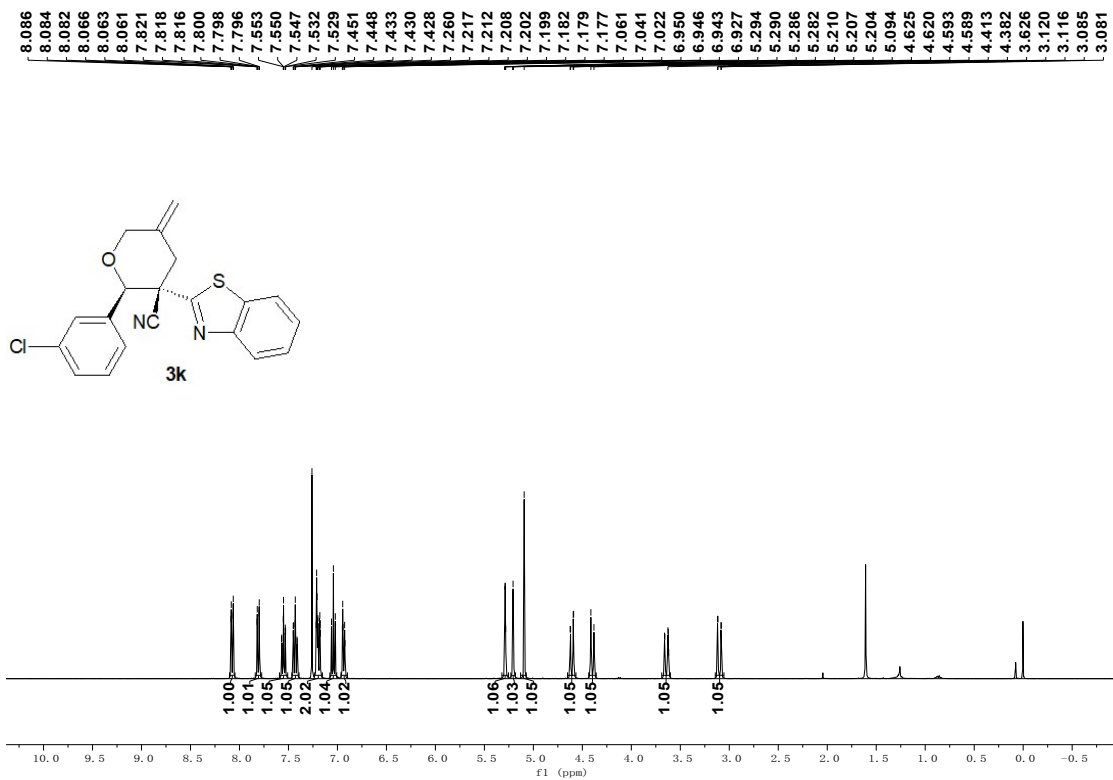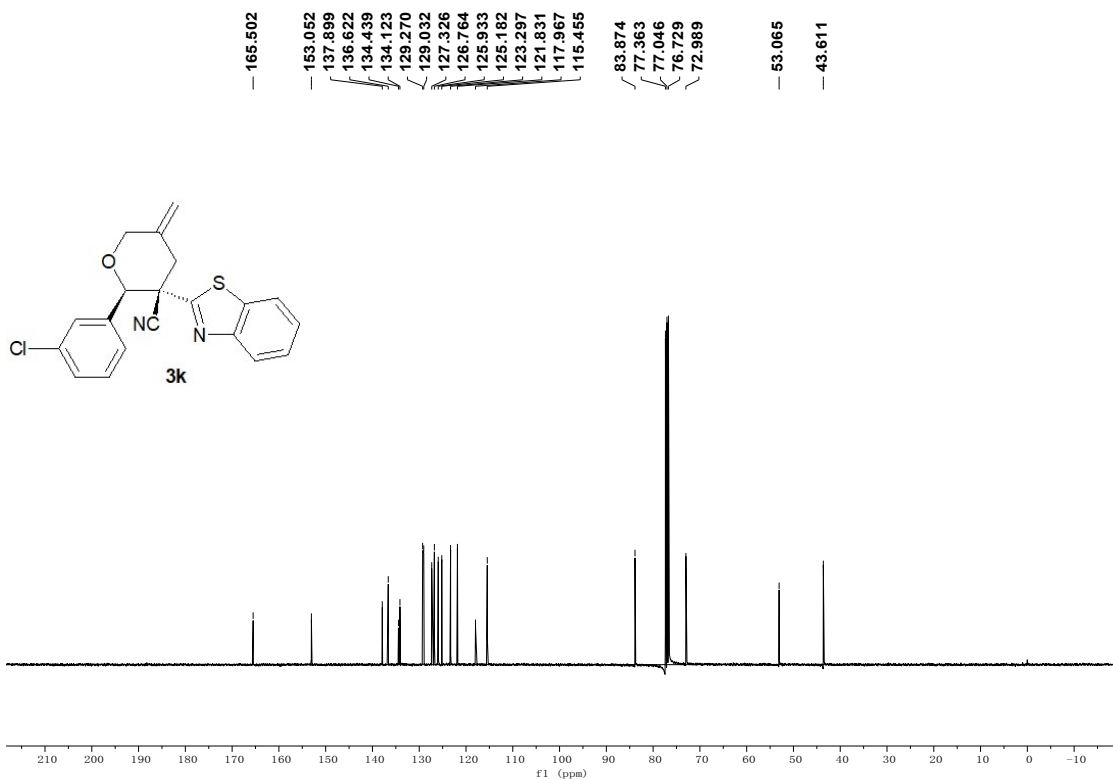



8.083  
8.081  
8.079  
8.062  
8.061  
8.058  
7.815  
7.813  
7.811  
7.795  
7.793  
7.791  
7.751  
7.548  
7.545  
7.530  
7.527  
7.448  
7.445  
7.430  
7.428  
7.425  
7.260  
7.083  
7.068  
7.063  
6.980  
6.956  
6.915  
6.912  
6.908  
6.847  
6.843  
6.840  
6.827  
6.824  
5.294  
5.290  
5.286  
5.282  
5.209  
5.206  
5.203  
5.119  
4.626  
4.622  
4.595  
4.590  
4.420  
4.389  
3.666  
3.631  
3.627  
3.117  
3.082  
3.077

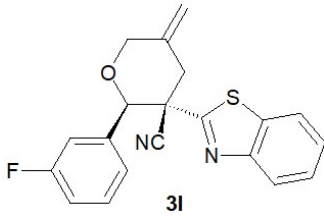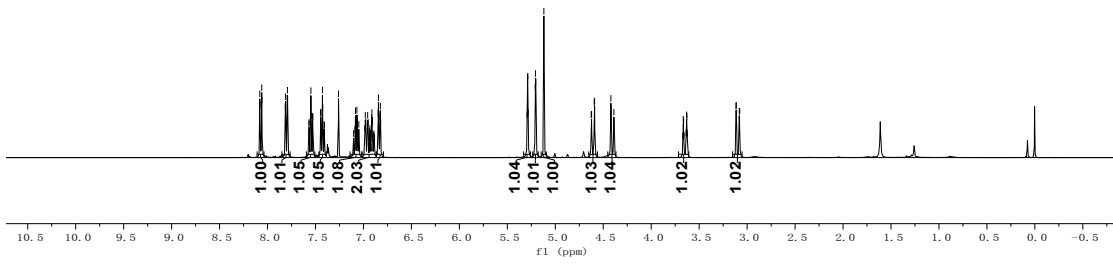

165.567  
163.588  
161.140  
153.068  
138.413  
138.340  
136.651  
134.449  
129.617  
129.537  
126.757  
125.918  
123.304  
122.721  
121.839  
118.048  
115.946  
115.736  
115.419  
114.414  
114.184  
83.895  
77.366  
77.048  
76.731  
72.975  
53.074  
43.678

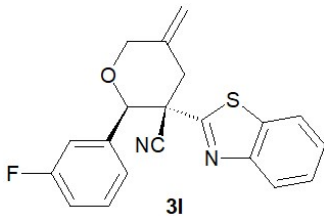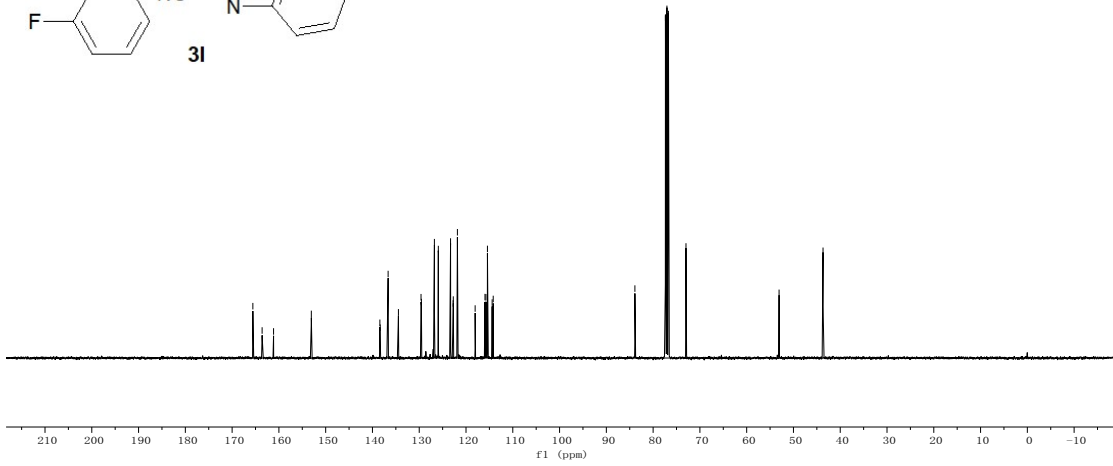

8.033  
8.031  
8.029  
8.021  
8.017  
8.012  
8.010  
8.008  
8.002  
7.998  
7.786  
7.783  
7.781  
7.765  
7.763  
7.761  
7.757  
7.504  
7.501  
7.487  
7.483  
7.418  
7.415  
7.409  
7.405  
7.400  
7.398  
7.395  
7.389  
7.386  
7.266  
7.260  
7.246  
7.242  
7.078  
7.075  
7.058  
7.055  
5.418  
5.300  
5.297  
5.293  
5.289  
5.241  
5.238  
5.235  
4.607  
4.602  
4.575  
4.571  
4.423  
4.391  
3.920  
3.182  
3.177  
3.146  
3.142

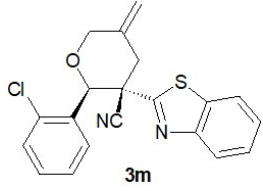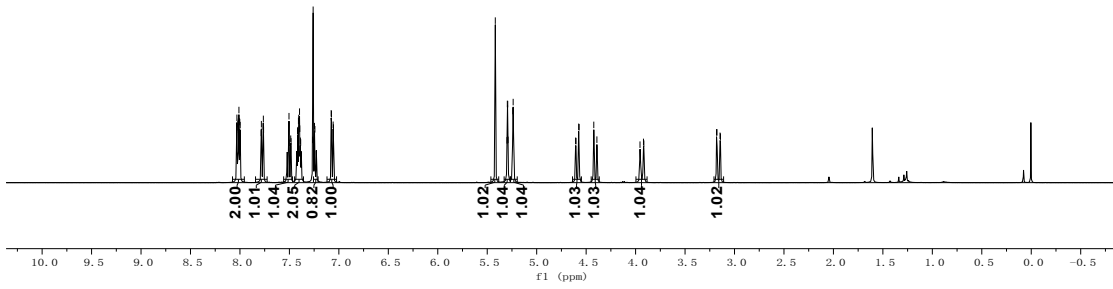

163.856  
152.654  
136.991  
135.553  
133.769  
133.717  
130.216  
129.435  
128.713  
127.240  
126.518  
125.768  
123.535  
121.615  
118.566  
115.360  
80.049  
77.360  
77.042  
76.725  
73.185  
52.495  
42.419

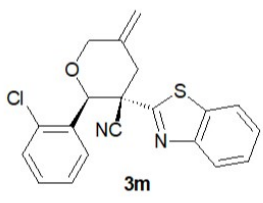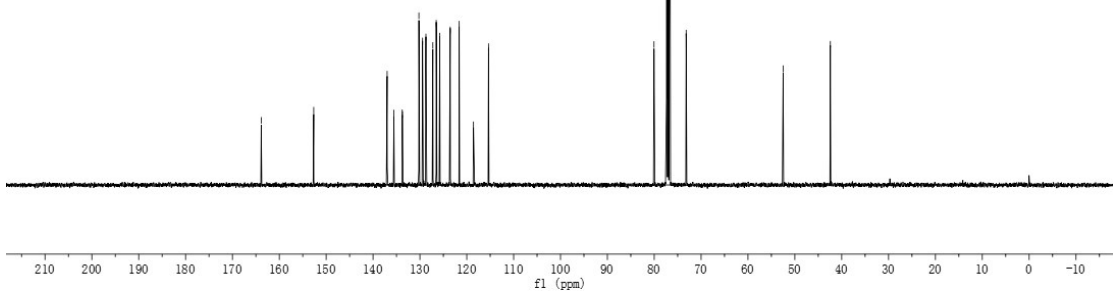

8.031  
8.029  
8.027  
8.021  
8.017  
8.011  
8.009  
8.007  
8.001  
7.997  
7.788  
7.786  
7.784  
7.768  
7.766  
7.764  
7.764  
7.757  
7.504  
7.502  
7.487  
7.484  
7.457  
7.453  
7.420  
7.417  
7.402  
7.399  
7.397  
7.298  
7.294  
7.278  
7.274  
7.260  
7.198  
7.193  
7.179  
7.175  
7.173  
5.388  
5.297  
5.293  
5.290  
5.245  
5.241  
5.238  
4.604  
4.600  
4.573  
4.568  
4.426  
4.395  
3.929  
3.925  
3.187  
3.182  
3.152  
3.147

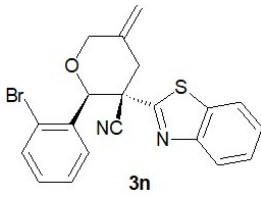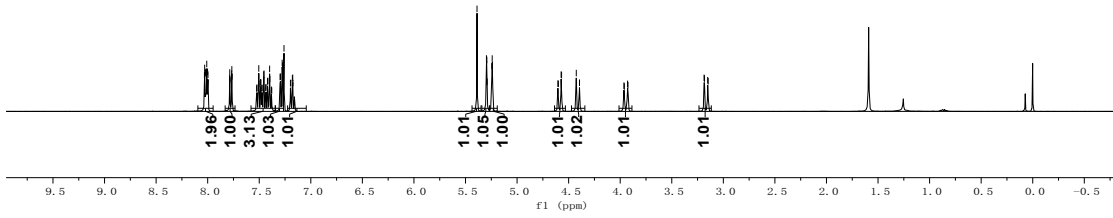

163.798  
152.590  
137.014  
135.769  
135.337  
132.109  
130.548  
129.761  
127.842  
126.510  
125.775  
124.381  
123.580  
121.616  
118.611  
116.375  
82.399  
77.359  
77.042  
76.724  
73.208  
52.423  
42.426

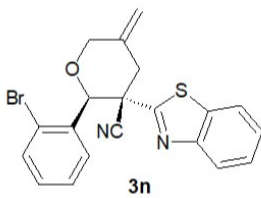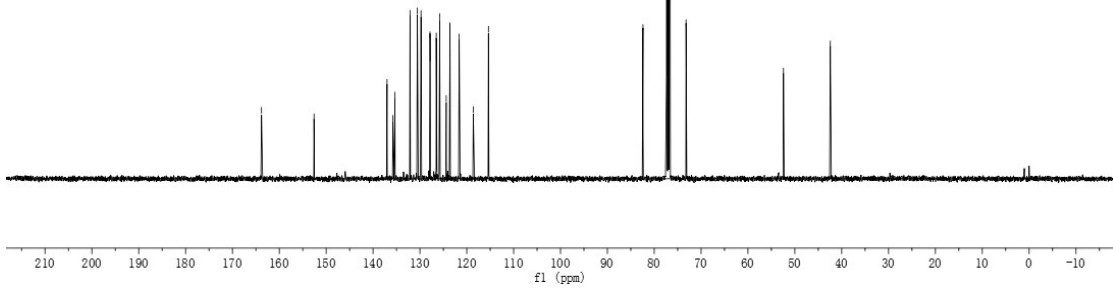

8.109  
8.106  
8.091  
8.088  
8.034  
8.031  
8.013  
8.009  
7.794  
7.774  
7.771  
7.643  
7.640  
7.623  
7.619  
7.585  
7.566  
7.546  
7.474  
7.471  
7.466  
7.461  
7.457  
7.453  
7.450  
7.445  
7.441  
7.438  
7.435  
7.264  
7.260  
7.246  
7.242  
7.076  
7.073  
7.070  
6.789  
6.778  
6.344  
6.340  
5.336  
5.332  
5.269  
5.265  
5.262  
4.711  
4.707  
4.680  
4.675  
4.536  
4.504  
4.007  
4.003  
3.218  
3.213  
3.183  
3.178

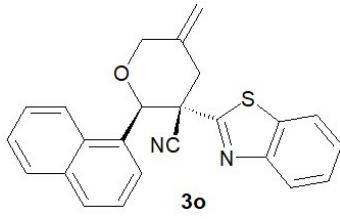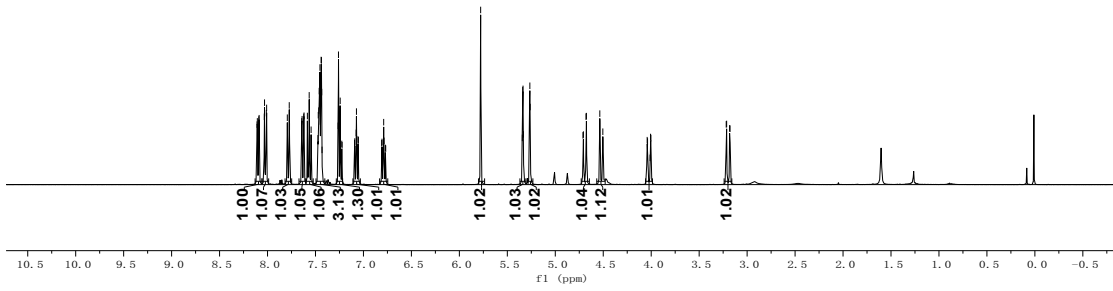

165.089  
162.640  
137.249  
135.138  
132.620  
131.993  
130.527  
129.503  
128.383  
126.338  
125.941  
125.463  
125.307  
124.959  
123.101  
121.803  
121.354  
118.776  
115.276  
112.732  
79.965  
77.374  
77.056  
76.738  
73.480  
53.520  
42.991

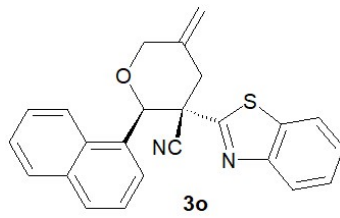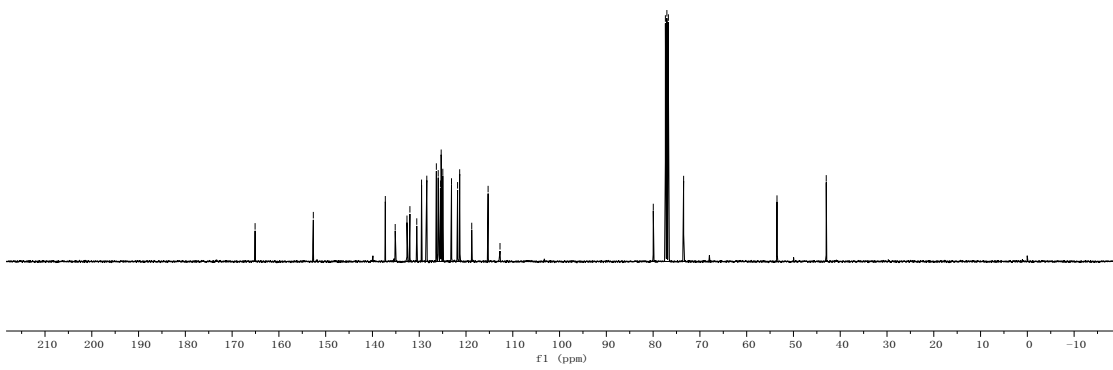

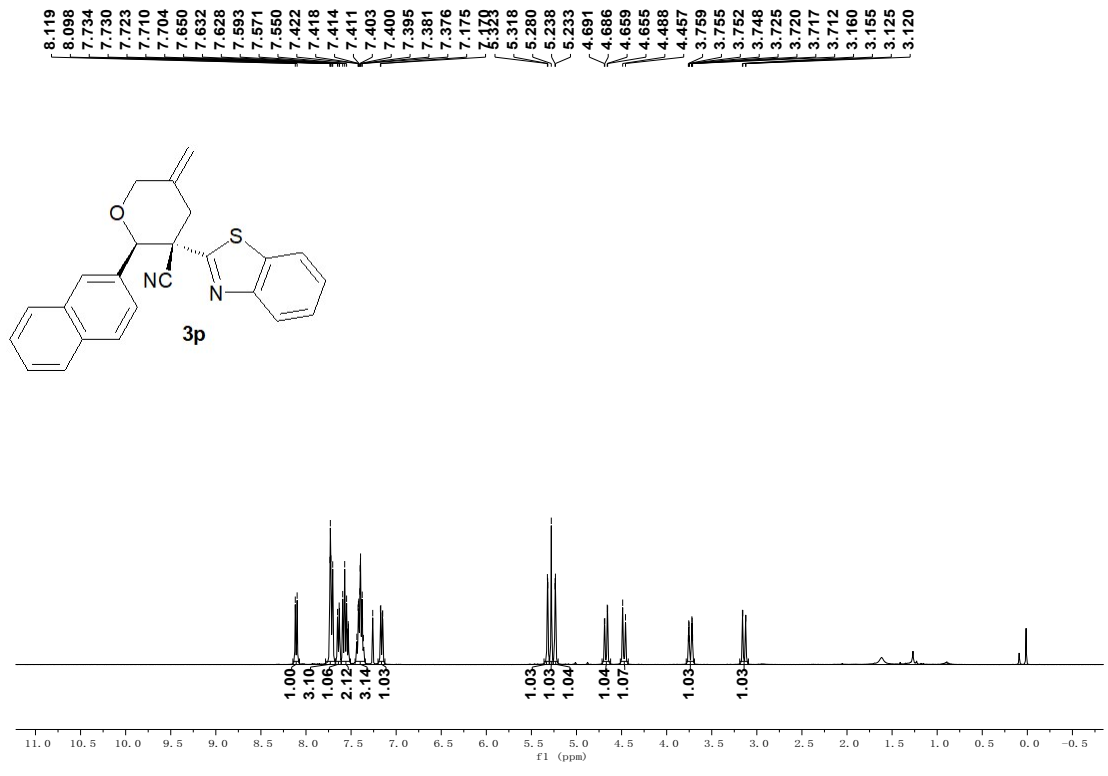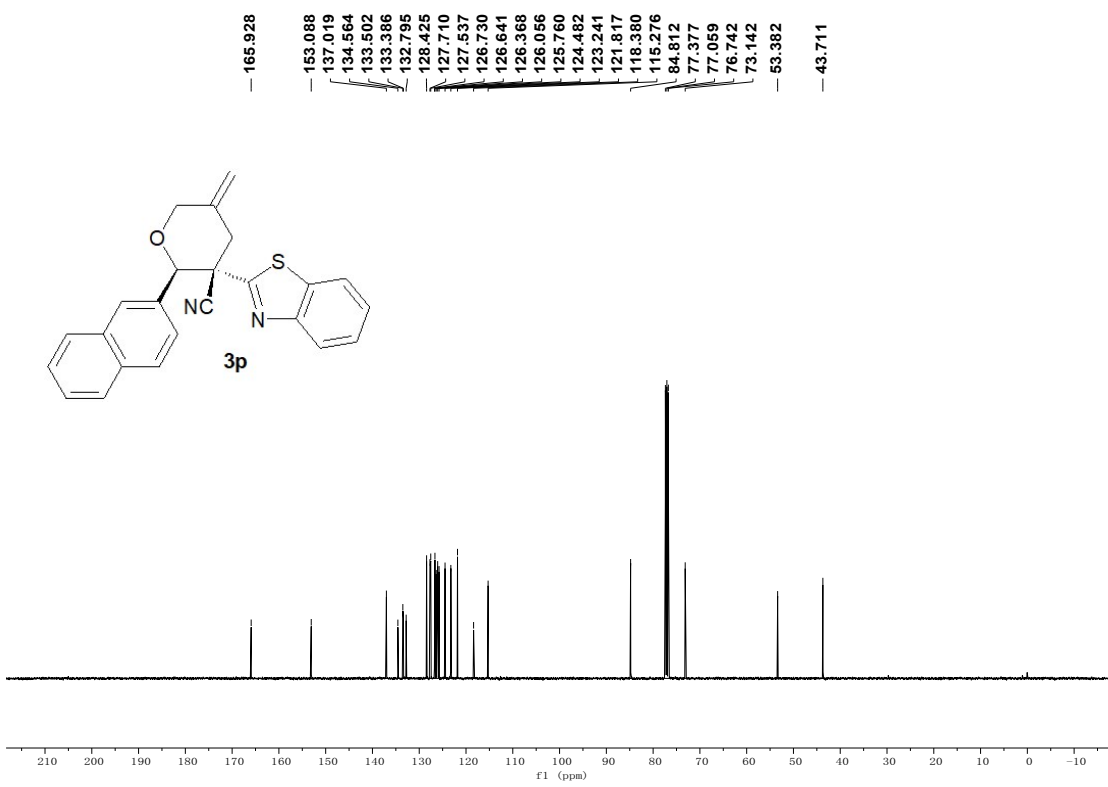

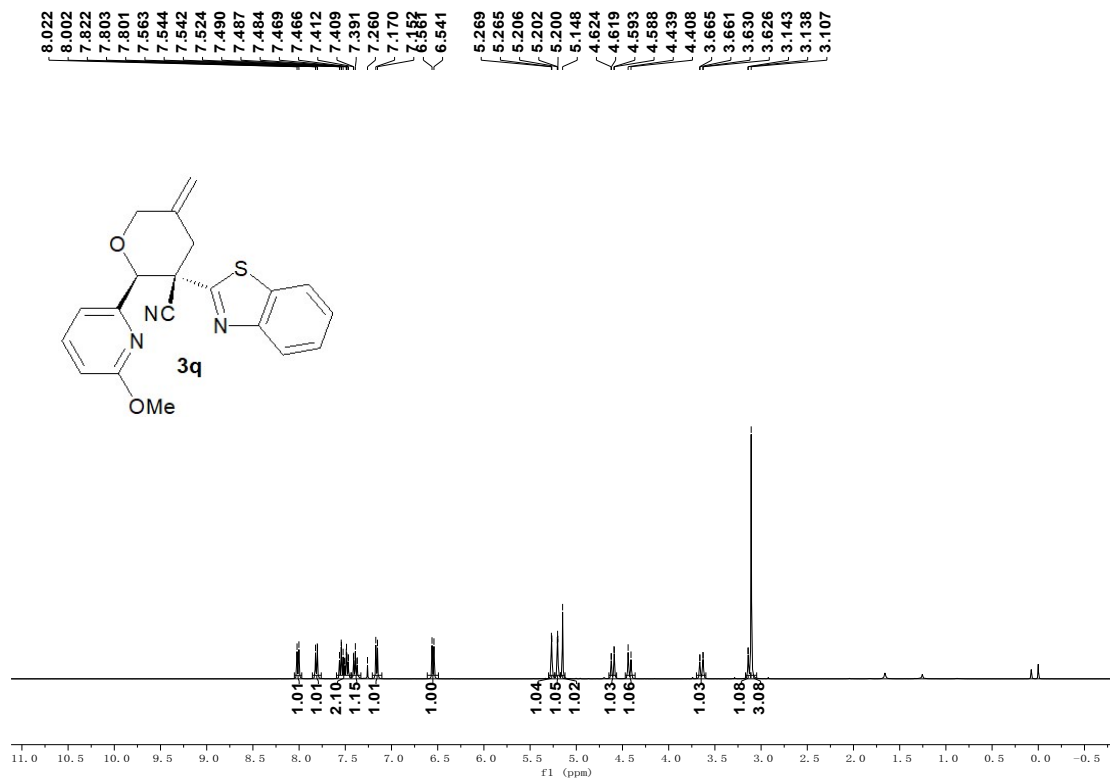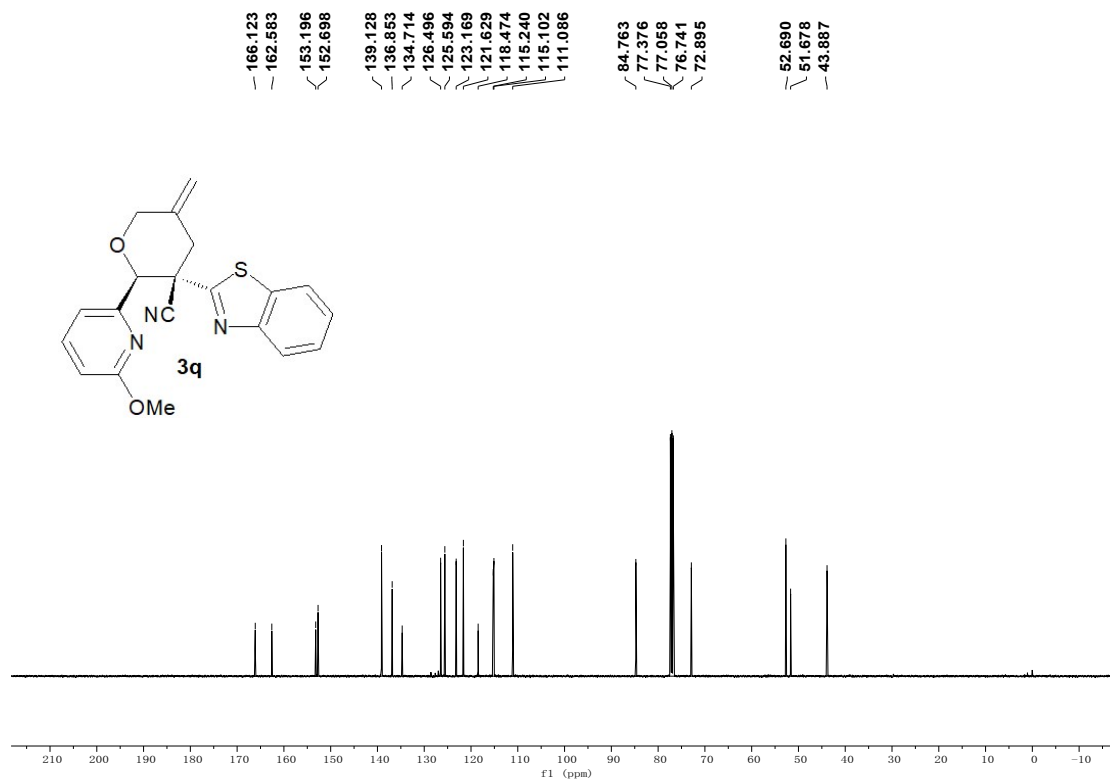

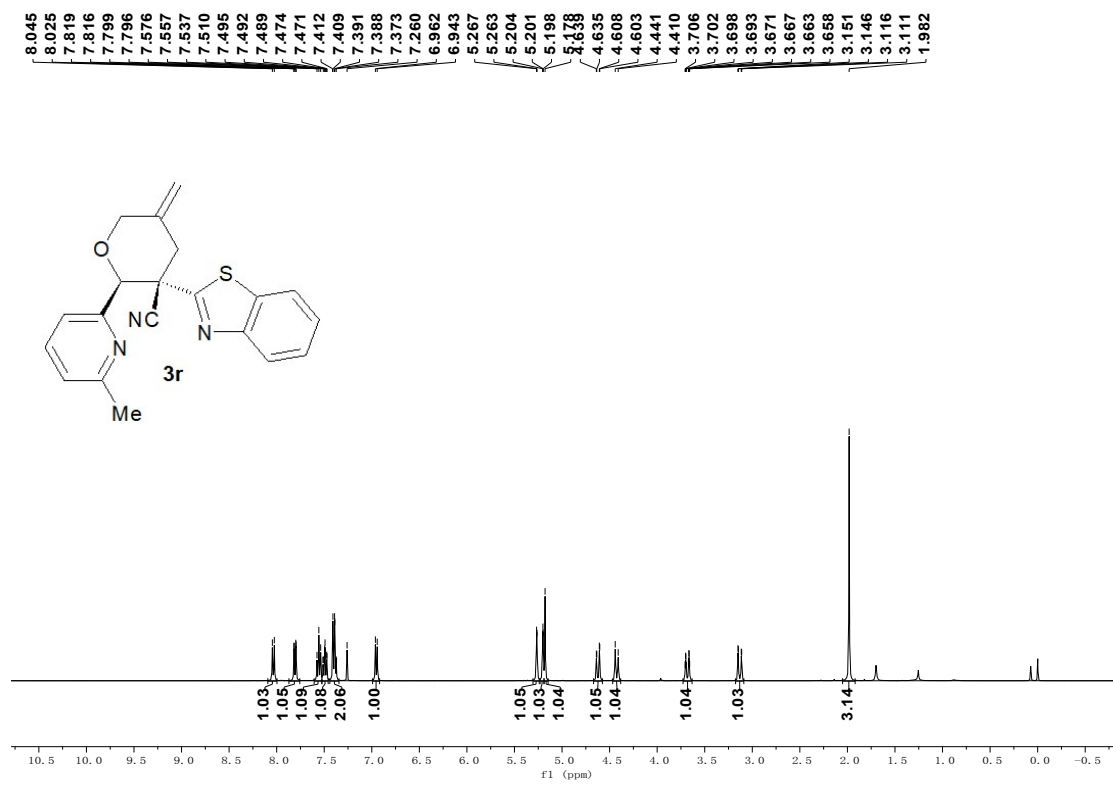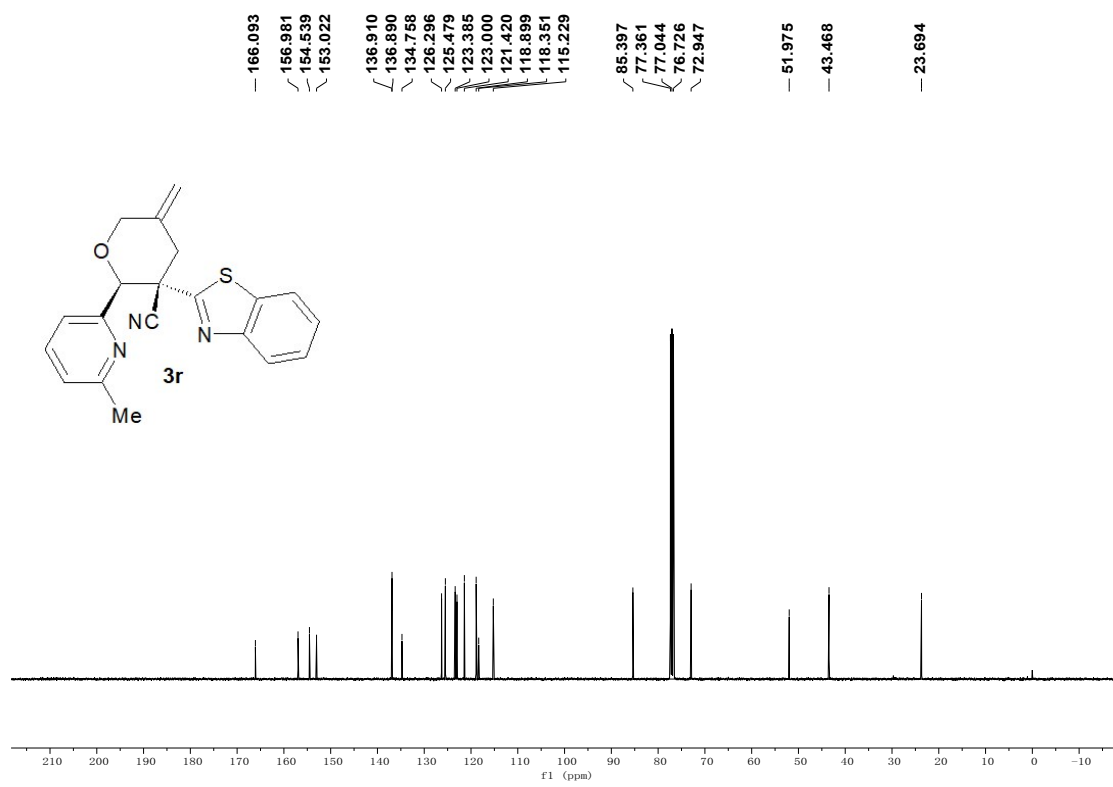

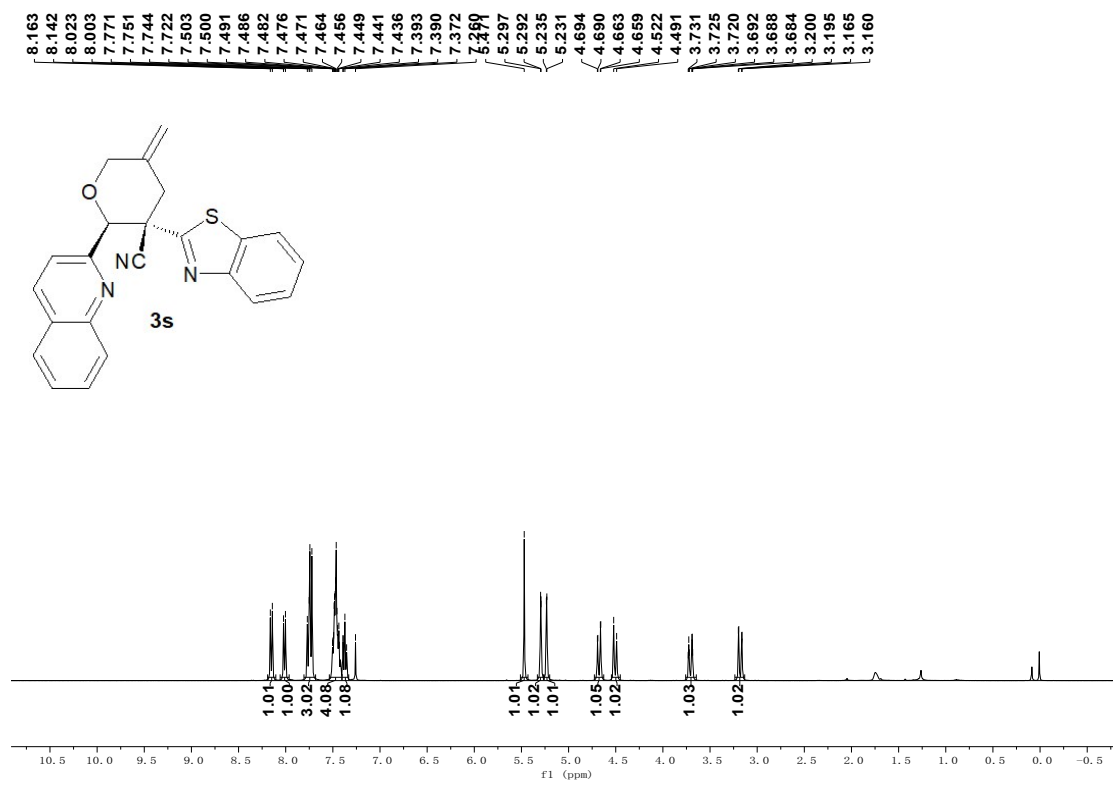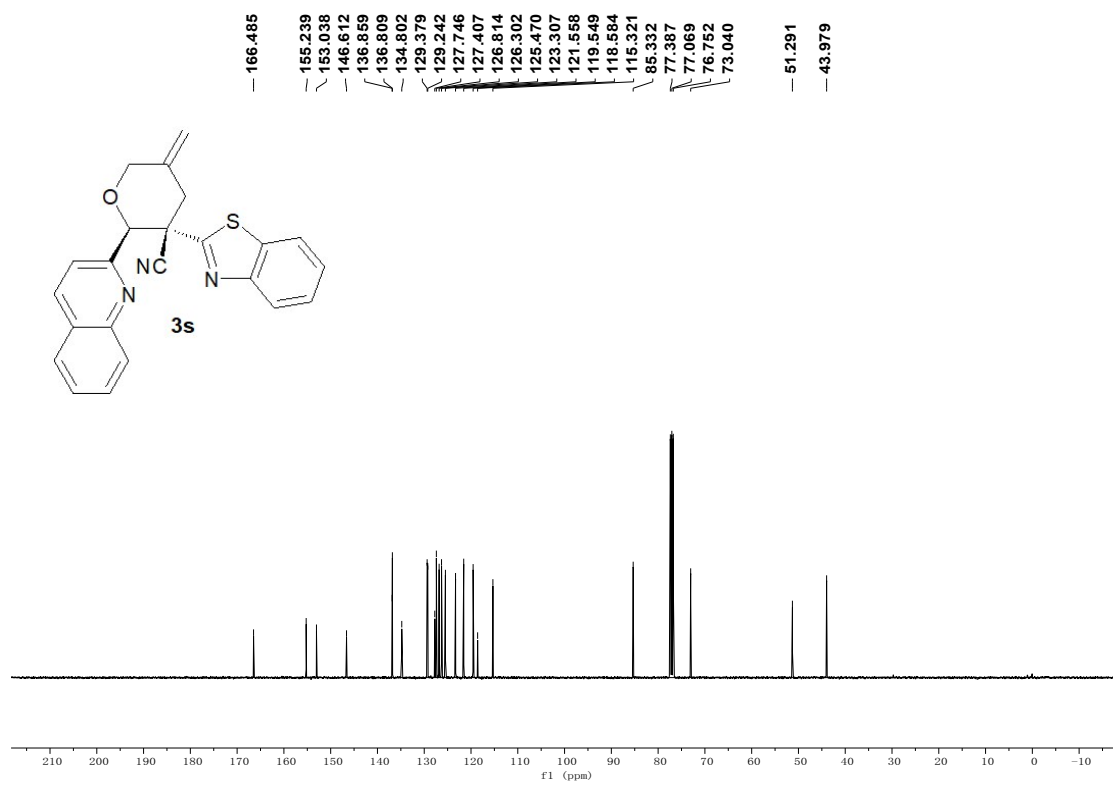



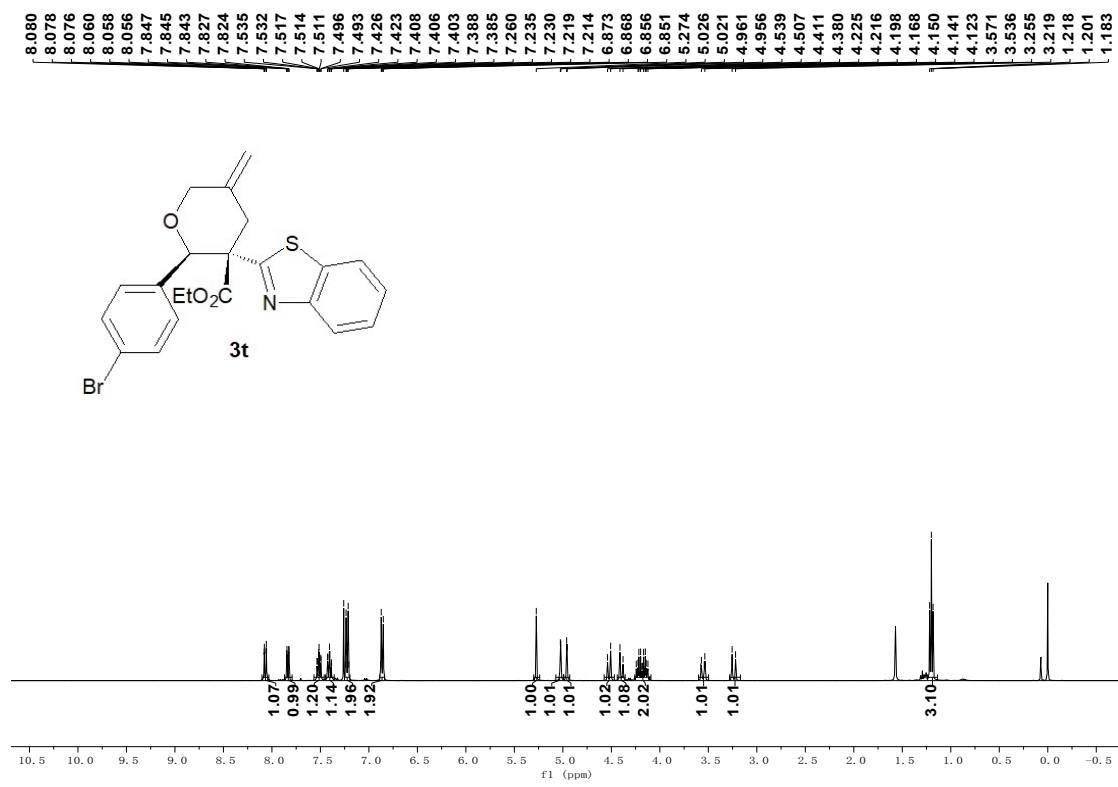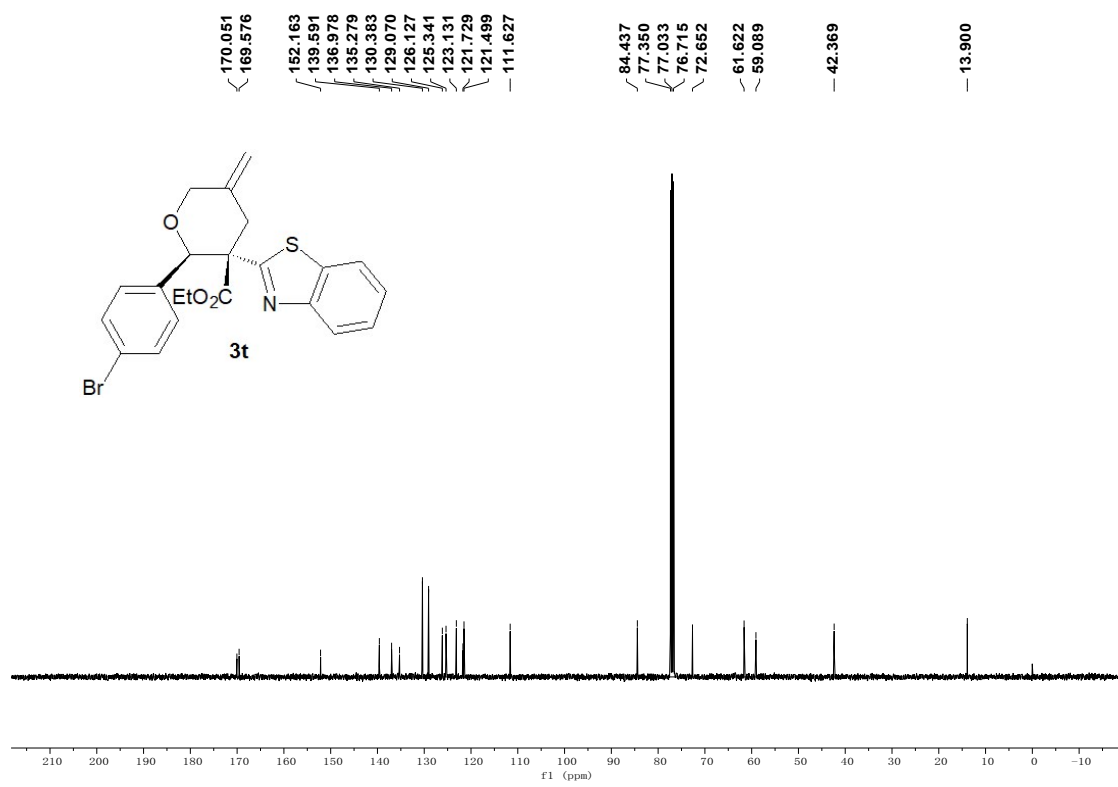

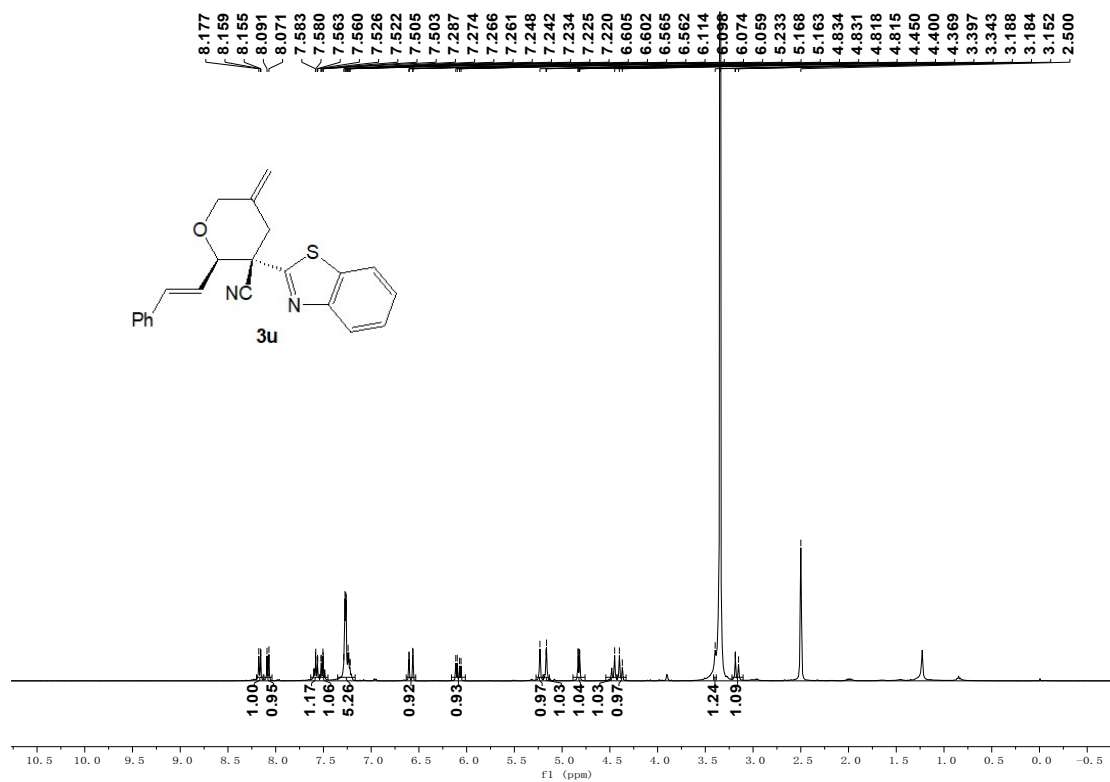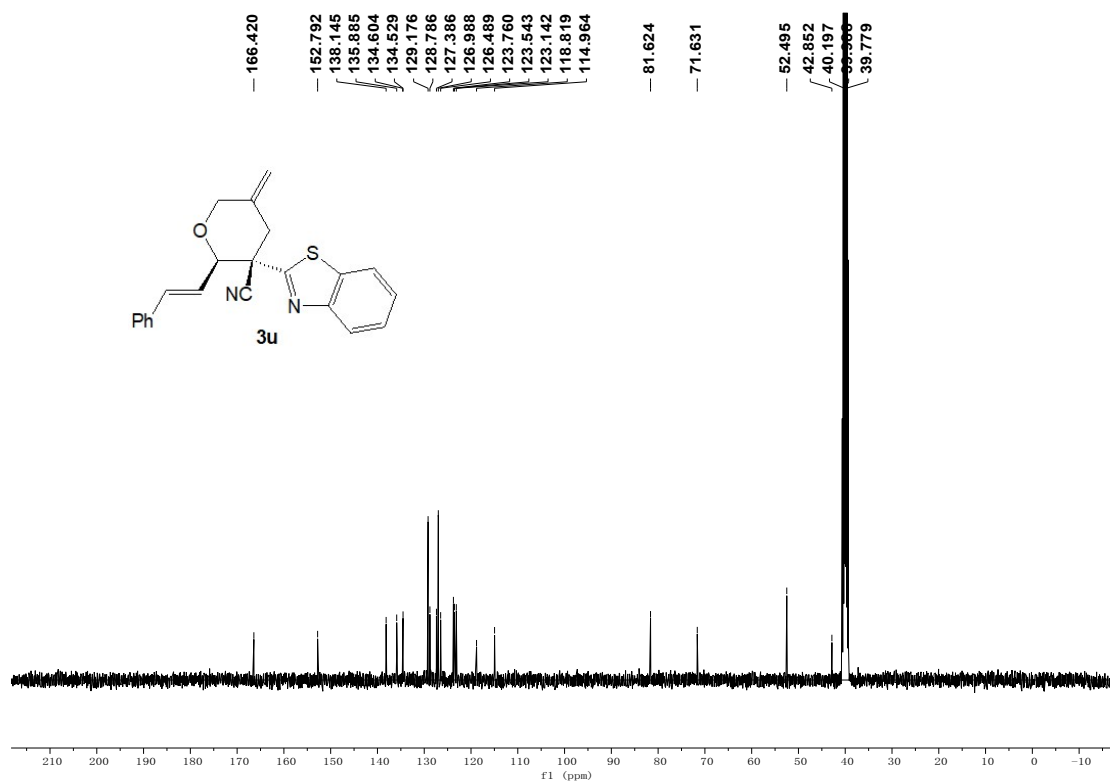

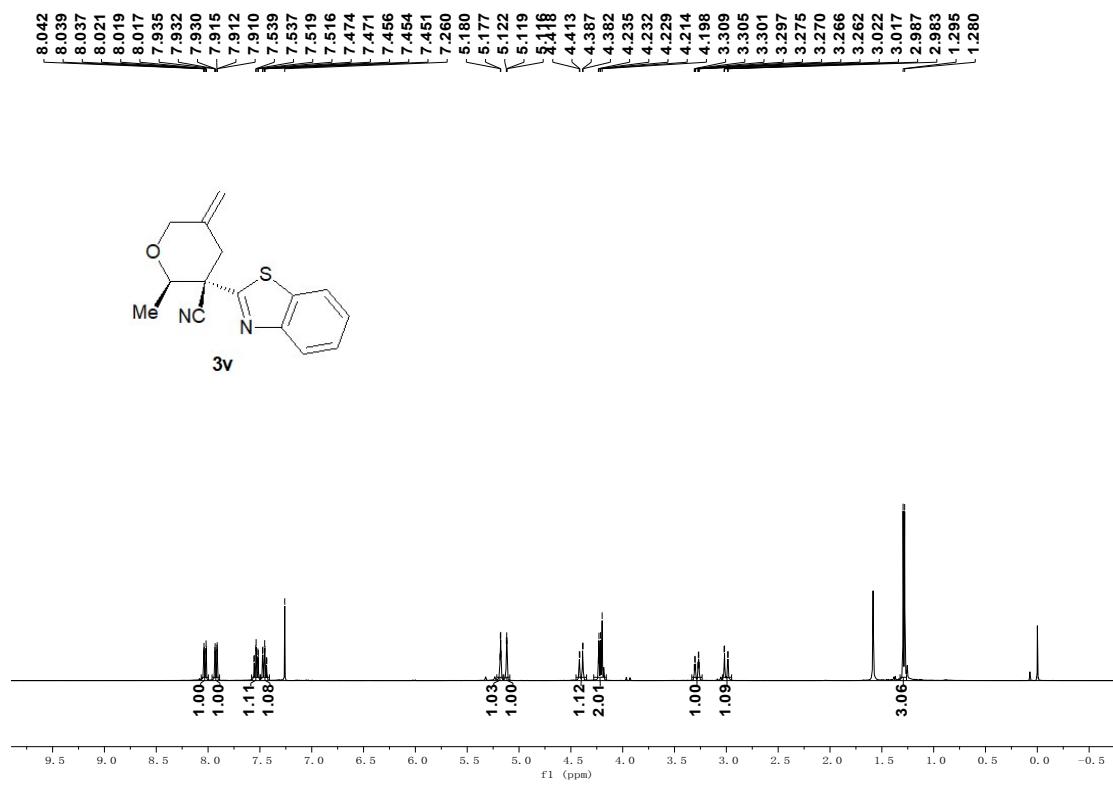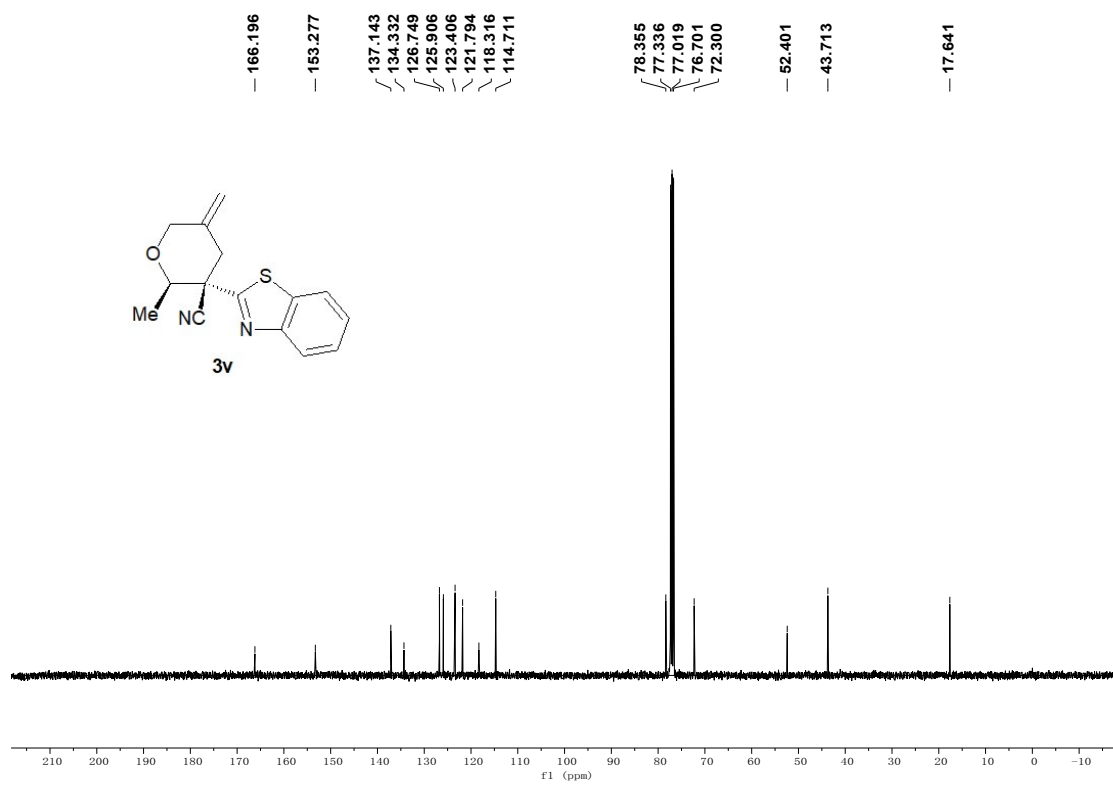

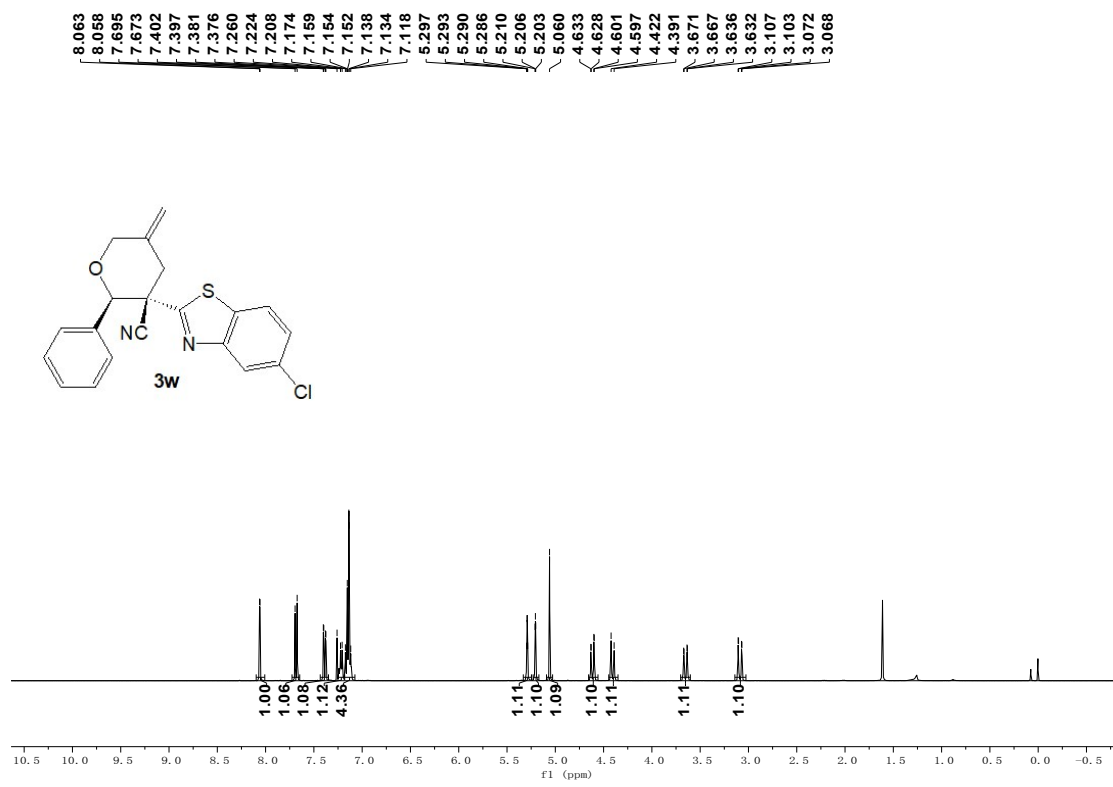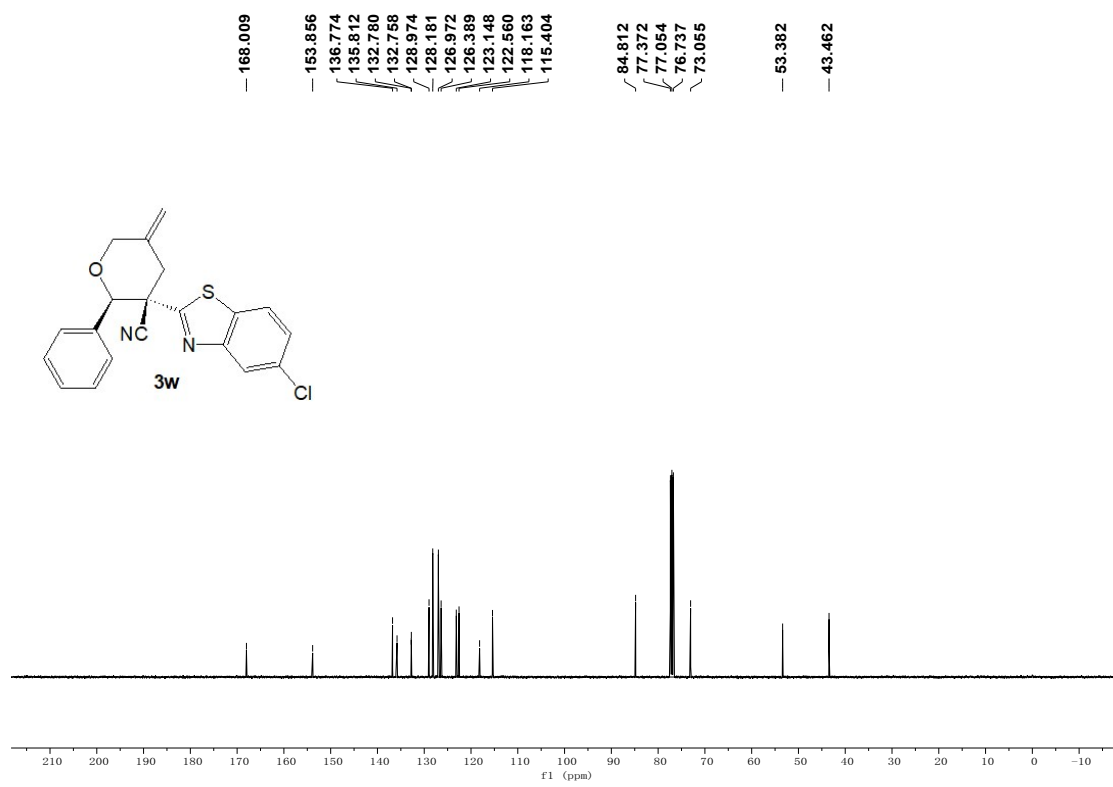

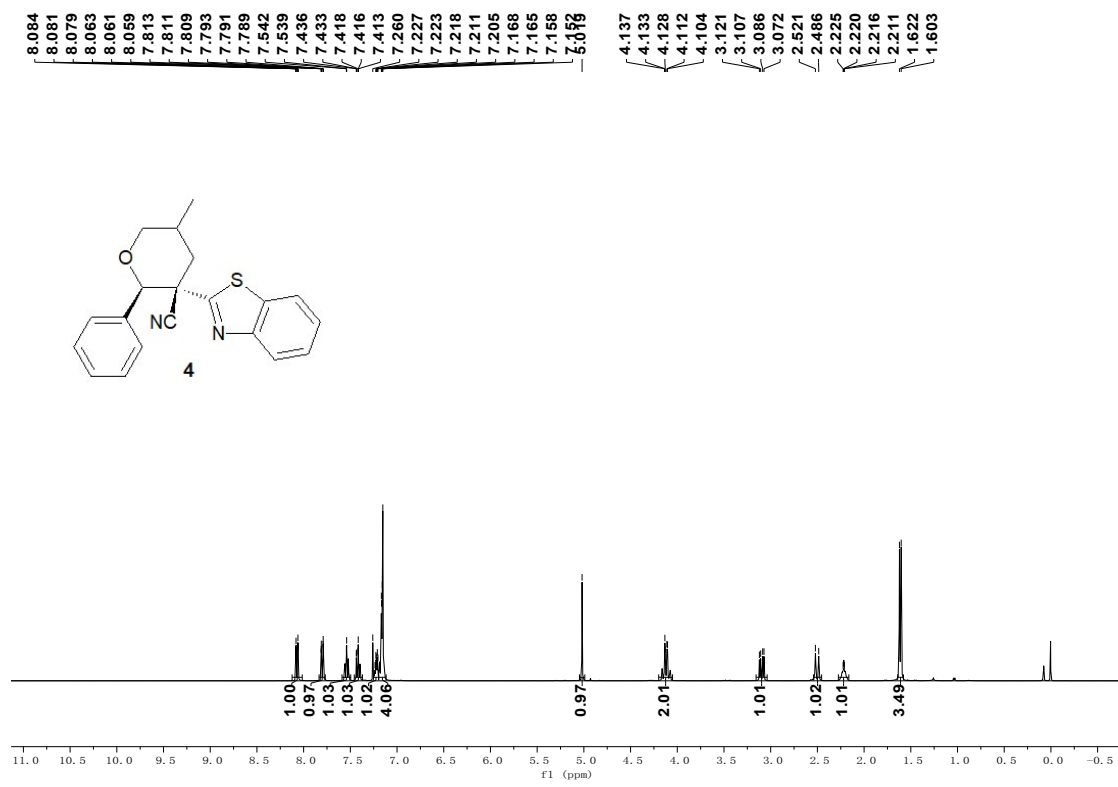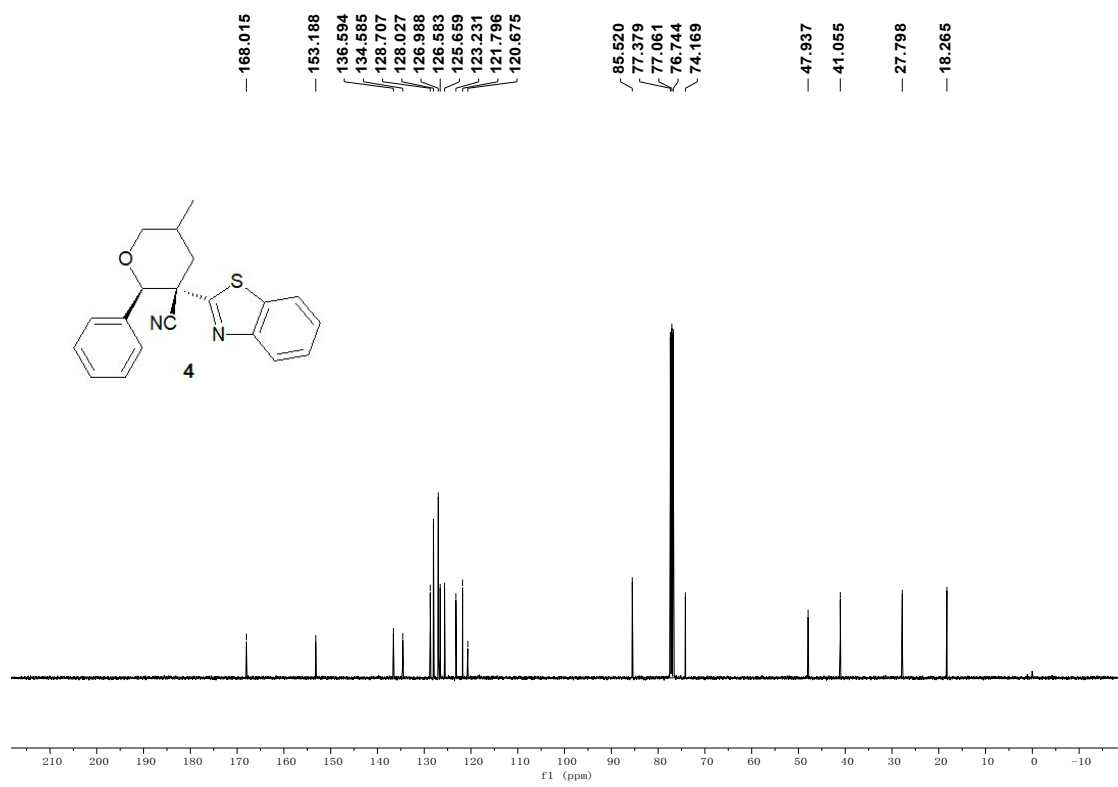

8.112  
8.091  
7.820  
7.818  
7.800  
7.797  
7.594  
7.590  
7.576  
7.573  
7.570  
7.555  
7.552  
7.469  
7.466  
7.451  
7.448  
7.446  
7.431  
7.428  
7.284  
7.278  
7.270  
7.265  
7.262  
7.255  
7.249  
7.216  
7.195  
7.189  
7.181  
7.168  
5.087  
4.277  
4.272  
4.248  
4.243  
3.843  
3.838  
3.814  
3.809  
3.528  
3.524  
3.494  
3.490  
3.165  
3.162  
3.154  
3.150  
3.128  
3.123  
3.116  
3.112  
2.268  
2.263  
2.235  
2.229

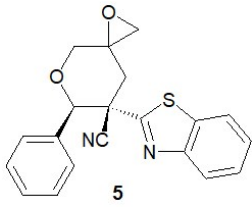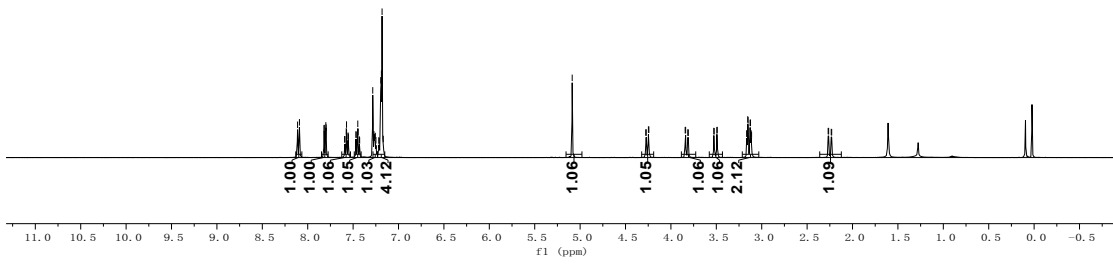

164.823  
152.995  
135.173  
134.512  
129.118  
128.223  
127.004  
126.756  
125.948  
123.435  
121.831  
118.328  
84.871  
77.363  
77.045  
76.728  
72.767  
55.788  
53.108  
52.452  
41.740

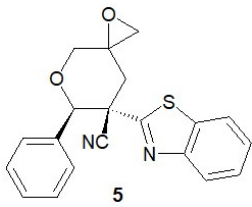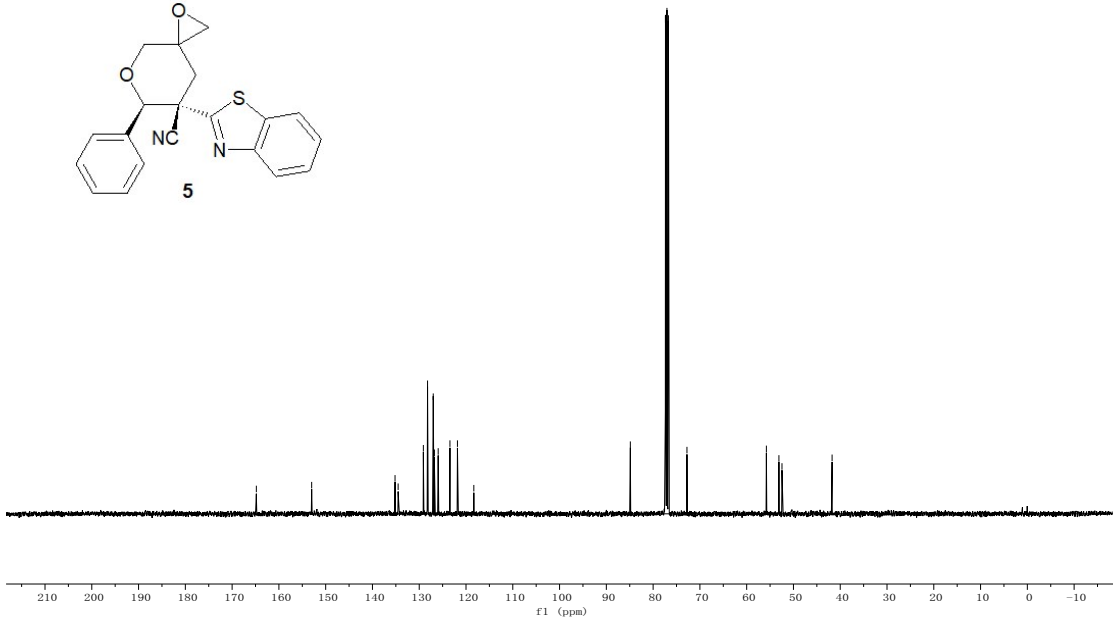

## 9. Reference

- [1] K. Wang, C. Chen, X. Liu, D. Li, T. Peng, X. Liu, D. Yang, and L. Wang, *Org. Lett.*, **2018**, *20*, 5260-5263.
- [2] Z. Yuan, R. Pan, H. Zhang, L. Liu, A. Lin, and H. Yao, *Adv. Synth. Catal.*, **2017**, *359*, 4244-4249.
